# Supplementary material for: Protocol of the China ST-segment elevation myocardial infarction (STEMI) Care Project (CSCAP): a 10-year project to improve quality of care by building up a regional STEMI care network
Source: PubMed Central journal article supplement — BMJ Open. 2019 Jul 17;9(7):e026362. doi: 10.1136/bmjopen-2018-026362 (PMC6661651; doi:10.1136/bmjopen-2018-026362), 2019-07-17
Supplement: bmjopen-2018-026362.draft_revisions.pdf [file bmjopen-2018-026362.draft_revisions.pdf]

# BMJ Open

BMJ Open is committed to open peer review. As part of this commitment we make the peer review history of every article we publish publicly available.

When an article is published we post the peer reviewers' comments and the authors' responses online. We also post the versions of the paper that were used during peer review. These are the versions that the peer review comments apply to.

The versions of the paper that follow are the versions that were submitted during the peer review process. They are not the versions of record or the final published versions. They should not be cited or distributed as the published version of this manuscript.

BMJ Open is an open access journal and the full, final, typeset and author-corrected version of record of the manuscript is available on our site with no access controls, subscription charges or pay-per-view fees (<http://bmjopen.bmj.com>).

If you have any questions on BMJ Open's open peer review process please email [info.bmjopen@bmj.com](mailto:info.bmjopen@bmj.com)

# BMJ Open

## Protocol of the China STEMI Care Project: a 10-year project to improve quality of care by building up the regional STEMI care network

|                               |                                                                                                                                                                                                                                                                                                                                                                                                                                                                                                                                                                                                                                                                                                                                                                                                                                                                                                                                                                                                                                                                                                                                                                                                                                                                                                                                                                                                                                                                                                                                                                                                                                                                                                                                                                                                                                                                                                                                                                                                                                                                                                                                                                                                                                                                                                  |
|-------------------------------|--------------------------------------------------------------------------------------------------------------------------------------------------------------------------------------------------------------------------------------------------------------------------------------------------------------------------------------------------------------------------------------------------------------------------------------------------------------------------------------------------------------------------------------------------------------------------------------------------------------------------------------------------------------------------------------------------------------------------------------------------------------------------------------------------------------------------------------------------------------------------------------------------------------------------------------------------------------------------------------------------------------------------------------------------------------------------------------------------------------------------------------------------------------------------------------------------------------------------------------------------------------------------------------------------------------------------------------------------------------------------------------------------------------------------------------------------------------------------------------------------------------------------------------------------------------------------------------------------------------------------------------------------------------------------------------------------------------------------------------------------------------------------------------------------------------------------------------------------------------------------------------------------------------------------------------------------------------------------------------------------------------------------------------------------------------------------------------------------------------------------------------------------------------------------------------------------------------------------------------------------------------------------------------------------|
| Journal:                      | <i>BMJ Open</i>                                                                                                                                                                                                                                                                                                                                                                                                                                                                                                                                                                                                                                                                                                                                                                                                                                                                                                                                                                                                                                                                                                                                                                                                                                                                                                                                                                                                                                                                                                                                                                                                                                                                                                                                                                                                                                                                                                                                                                                                                                                                                                                                                                                                                                                                                  |
| Manuscript ID                 | bmjopen-2018-026362                                                                                                                                                                                                                                                                                                                                                                                                                                                                                                                                                                                                                                                                                                                                                                                                                                                                                                                                                                                                                                                                                                                                                                                                                                                                                                                                                                                                                                                                                                                                                                                                                                                                                                                                                                                                                                                                                                                                                                                                                                                                                                                                                                                                                                                                              |
| Article Type:                 | Protocol                                                                                                                                                                                                                                                                                                                                                                                                                                                                                                                                                                                                                                                                                                                                                                                                                                                                                                                                                                                                                                                                                                                                                                                                                                                                                                                                                                                                                                                                                                                                                                                                                                                                                                                                                                                                                                                                                                                                                                                                                                                                                                                                                                                                                                                                                         |
| Date Submitted by the Author: | 29-Aug-2018                                                                                                                                                                                                                                                                                                                                                                                                                                                                                                                                                                                                                                                                                                                                                                                                                                                                                                                                                                                                                                                                                                                                                                                                                                                                                                                                                                                                                                                                                                                                                                                                                                                                                                                                                                                                                                                                                                                                                                                                                                                                                                                                                                                                                                                                                      |
| Complete List of Authors:     | <p>Zhang, Yan; Peking University First Hospital, Department of Cardiology<br/>         Yu, Bo; Key Laboratories of Education Ministry for Myocardial Ischemia Mechanism and Treatment, 2nd Affiliated Hospital of Harbin Medical University, Cardiology<br/>         Han, YL; The General Hospital of Shenyang Military, department of cardiology<br/>         Wang, Jianan; The Second Affiliated Hospital, Zhejiang University, Department of Cardiology<br/>         Yang, Lixia; Kunming General Hospital of Chengdu Military Command of PLA, department of cardiology<br/>         Wan, Zheng; The General Hospital of Tianjin Medical University, department of cardiology<br/>         Zhang, Zheng; The First Hospital of Lanzhou University, department of cardiology<br/>         Chen, Yu-guo; Shandong University, Department of Emergency<br/>         Fu, Xianghua; Shanxi Cardiovascular Hospital, department of cardiology<br/>         Gao, Chuanyu; Henan Provincial People's Hospital, Zhengzhou University People's Hospital, Cardiology<br/>         Li, Bao; Shanxi Cardiovascular Hospital, department of cardiology<br/>         Chen, Ji-yan; Guangdong Cardiovascular Institute, Guangdong provincial Key Laboratory of Coronary Heart Disease Prevention, Guangdong General Hospital, Guangdong Academy of Medical Sciences, Cardiology<br/>         Wu, Ming; Hainan General Hospital, Department of cardiology<br/>         Ma, Yitong; The First Affiliated Hospital of Xinjiang Medical University, department of cardiology<br/>         Zhao, Xingsheng; Inner Mongolia People's Hospital, department of cardiology<br/>         Chen, Yundai; Chinese PLA General Hospital, department of cardiology<br/>         Yan, Hongbing; Fuwai Hospital, Chinese Academy of Medical Sciences, department of cardiology<br/>         Xiang, Dingcheng; General Hospital of Guangzhou Military Command of PLA, department of cardiology<br/>         Fang, Weiyi; Shanghai Chest Hospital, department of cardiology<br/>         Mehta, Sameer; Lumen Foundation<br/>         Naber, Christoph K; Stent Save a Life<br/>         Ge, Junbo; Zhongshan Hospital Fudan University, department of cardiology<br/>         Huo, Yong ; Peking University First Hospital,</p> |

1  
2  
3  
4  
5  
6  
7  
8  
9  
10  
11  
12  
13  
14  
15  
16  
17  
18  
19  
20  
21  
22  
23  
24  
25  
26  
27  
28  
29  
30  
31  
32  
33  
34  
35  
36  
37  
38  
39  
40  
41  
42  
43  
44  
45  
46  
47  
48  
49  
50  
51  
52  
53  
54  
55  
56  
57  
58  
59  
60

|           |                                                                                            |
|-----------|--------------------------------------------------------------------------------------------|
| Keywords: | Accreditation, chest pain center, network, reperfusion, ST-elevation myocardial infarction |
|           |                                                                                            |

SCHOLARONE™  
Manuscripts

1  
2  
3  
4 **Protocol of the China STEMI Care Project: a 10-year project to improve quality**  
5  
6 **of care by building up the regional STEMI care network**  
7  
8  
9

10 Yan Zhang<sup>1</sup>, Bo Yu<sup>2</sup>, Yaling Han<sup>3</sup>, Jianan Wang<sup>4</sup>, Lixia Yang<sup>5</sup>, Zheng Wan<sup>6</sup>, Zheng  
11 Zhang<sup>7</sup>, Yuguo Chen<sup>8</sup>, Xianghua Fu<sup>9</sup>, Chuanyu Gao<sup>10</sup>, Bao Li<sup>11</sup>, Jiyan Chen<sup>12</sup>, Ming  
12 Wu<sup>13</sup>, Yitong Ma<sup>14</sup>, Xingsheng Zhao<sup>15</sup>, Yundai Chen<sup>16</sup>, Hongbing Yan<sup>17</sup>, Dingcheng  
13 Xiang<sup>18</sup>, Weiyi Fang<sup>19</sup>, Sameer Mehta<sup>20</sup>, Christoph K. Naber<sup>21</sup>, Junbo Ge<sup>22</sup>, \*Yong  
14  
15  
16  
17  
18  
19  
20  
21  
22  
23  
24  
25  
26  
27  
28  
29  
30  
31  
32  
33  
34  
35  
36  
37  
38  
39  
40  
41  
42  
43  
44  
45  
46  
47  
48  
49  
50  
51  
52  
53  
54  
55  
56  
57  
58  
59  
60

Huo<sup>1</sup>, on behalf of China STEMI Care Project (CSCAP) Investigators

1. Department of Cardiology, Peking University First Hospital, Beijing, China
2. Department of Cardiology, The Second Affiliated Hospital of Harbin Medical University, Harbin, Heilongjiang Province, China
3. Department of Cardiology, The General Hospital of Shenyang Military, Shenyang, Liaoning Province, China
4. Department of Cardiology, The Second Affiliated Hospital Zhejiang University School of Medicine, Hangzhou, Zhejiang Province, China
5. Department of Cardiology, Kunming General Hospital of Chengdu Military Command of PLA, Kunming, Yunnan Department of Cardiology,
6. Department of Cardiology, Tianjin Medical University General Hospital, Tianjin, China
7. Department of Cardiology, The First Hospital of Lanzhou University, Lanzhou, Gansu Province, China

- 1  
2  
3  
4  
5  
6  
7  
8  
9  
10  
11  
12  
13  
14  
15  
16  
17  
18  
19  
20  
21  
22  
23  
24  
25  
26  
27  
28  
29  
30  
31  
32  
33  
34  
35  
36  
37  
38  
39  
40  
41  
42  
43  
44  
45  
46  
47  
48  
49  
50  
51  
52  
53  
54  
55  
56  
57  
58  
59  
60
8. Department of Emergency, Qilu Hospital of Shandong University, Jinan, Shandong Province, China
9. Department of Cardiology, The Second Hospital of Hebei Medical University, Shijiazhuang, Hebei Province, China
10. Department of Cardiology, Henan Provincial People's Hospital, Zhengzhou, Henan Province, China
11. Department of Cardiology, Shanxi Cardiovascular Hospital, Taiyuan, Shanxi Province, China
12. Department of Cardiology, Guangdong General Hospital, Guangzhou, Guangdong Province, China
13. Department of Cardiology, Hainan General Hospital, Haikou, Hainan Province, China
14. Department of Cardiology, The First Affiliated Hospital of Xinjiang Medical University, Urumchi, The Xinjiang Uygur Autonomous Region, China
15. Department of Cardiology, Inner Mongolia People's Hospital, Hohhot, The Inner Mongolia Autonomous Region, China
16. Department of Cardiology, Chinese PLA General Hospital, Beijing, China
17. Department of Cardiology, Fuwai Hospital, Chinese Academy of Medical Sciences, Beijing, China
18. Department of Cardiology, General Hospital of Guangzhou Military Command of PLA, Guangzhou, Guangdong Province, China
19. Department of Cardiology, Shanghai Chest Hospital, Shanghai, China

1  
2  
3  
4  
5  
6  
7  
8  
9  
10  
11  
12  
13  
14  
15  
16  
17  
18  
19  
20  
21  
22  
23  
24  
25  
26  
27  
28  
29  
30  
31  
32  
33  
34  
35  
36  
37  
38  
39  
40  
41  
42  
43  
44  
45  
46  
47  
48  
49  
50  
51  
52  
53  
54  
55  
56  
57  
58  
59  
60

20. Lumen Foundation, Miami, USA

21. Stent Save a Life, Paris, France

22. Department of Cardiology, Zhongshan Hospital Fudan University, Shanghai,  
China

**Running title:** Protocol of 10-year China STEMI Care Project

**Corresponding author:** Yong Huo, MD

Peking University First Hospital, Department of Cardiology

8 Xishiku St, Xicheng District, Beijing, China, 100035

Email: huoyong@263.net.cn

Phone: 86-10-83572283

Fax: 86-10-66137748

**Date:**

This project was initialed in 2011 and will be finished in 2021.

## Abstract

**Introduction:** The China STEMI (ST-elevation myocardial infarction) Care Project (CSCAP) aimed to improve the reperfusion treatment rate and shorten the total duration of myocardial ischemia by establishing a regional STEMI treatment network covering the whole city region, whole city population, and whole disease processes step by step.

**Methods and analysis:** This is a prospective, multicenter registry involving three stages. And the CSCAP included 18 provinces, 4 municipalities, and 2 autonomous regions in China. Patients with STEMI who met with the third acute myocardial infarction definition of 2012 and the Chinese STEMI diagnosis and treatment guidelines were enrolled. Phase 1 focused on the in-hospital process optimization of primary percutaneous coronary intervention (PPCI) hospitals; phase 2 on the PPCI hospital-based regional STEMI transfer network, including emergency medical services and non-PPCI hospitals; and phase 3 on the whole-city STEMI care network construction by promoting chest pain center accreditation. Systematic data collection, assessment of quality of care, and subsequent improvement were implemented throughout the project to continuously improve the quality of care for patients with STEMI in the project.

**Ethics and dissemination:** CSCAP, with the establishment of an intrinsic feedback and certification system, will provide a tailored and continuous quality of STEMI care improvement plan based on the conditions of different regions to further integrate the STEMI care network nationwide.

1  
2  
3  
4  
5  
6 **Key words:** Accreditation, chest pain center, network, reperfusion, ST-elevation  
7  
8 myocardial infarction  
9

### 10 11 12 13 **Strengths and limitations of this study** 14

15  
16 CSCAP is the first project that focused on establishing a regional STEMI emergency  
17  
18 care network in China, which will help to understand the condition of STEMI care in  
19  
20 China extensively. Moreover, quality of STEMI care will be optimized through  
21  
22 in-hospital process optimization, PPCI hospital-based regional STEMI transfer  
23  
24 network construction, and the whole-city STEMI care network construction step by  
25  
26 step. However, hospitals in CSCAP were not randomly selected, which might be  
27  
28 because of lack of representatives to some degree. Alternatively, it will provide a  
29  
30 tailored quality of care improvement plan based on the conditions of different regions.  
31  
32  
33  
34  
35  
36  
37  
38  
39  
40  
41  
42  
43  
44  
45  
46  
47  
48  
49  
50  
51  
52  
53  
54  
55  
56  
57  
58  
59  
60



## Introduction

The disease burden of cardiovascular diseases is increasing, posing a major public health issue in China. China will have another 75 million patients with myocardial infarction in the next 15 years with the increasing risk factors and aging population [1]. The Chinese cardiovascular report in 2016 showed an increase in both the hospitalization ratio and mortality of acute myocardial infarction (AMI) over the years. The mortality of AMI is higher in rural areas than in the city, and the younger population is most vulnerable [2].

Acute ST-elevation myocardial infarction (STEMI), mainly caused by a sudden obstruction of the coronary artery with thrombus, benefits from both increasing reperfusion rate and shortening of the duration from the symptom occurrence to the opening of the target vessel [3 4]. Although implementing evidence-based medicine significantly improves the prognosis of patients with STEMI, the gap of the translational application is still large in real-world settings [5]. A majority of Chinese patients with STEMI miss the optimal treatment timing due to restrictions from both patients and medical services [6]. Additionally, the ratio of significant deficiency in STEMI reperfusion treatment remained at the level of around 55% in the last decade; hence, the in-hospital mortality has not changed significantly yet [7].

The effective treatment of STEMI is a systematic issue, and the solution is neither a novel thrombolytic drug nor an intervention device. It can be brought about by comprehensive factors, including patient health awareness, physician level, physician–patient relationship, medical reimbursement system, prehospital emergency

1  
2  
3  
4 system, in-hospital treatment, connection mechanism between prehospital and  
5  
6 in-hospital care, and posthospital management. Successful experiences from both  
7  
8 American Lifeline program and the European Stent – Save a Life can be used for  
9  
10 reference. The quality of medical service can be significantly improved when regional  
11  
12 STEMI care network is established through close collaboration at different levels of  
13  
14  
15 hospitals and the emergency medical system (EMS) [8 9].  
16  
17

18  
19 China has gradually increased the input of medical insurance in the last few  
20  
21 decades. However, how to implement the best treatment for STEMI, keeping in mind  
22  
23 the differences in geographical, humanistic, and medical insurance policy coverage,  
24  
25 still needs to be discussed. At present, little information exists about whether the  
26  
27 foreign STEMI guide is difficult to be widely used in China because of the differences  
28  
29 between the East and the West. Therefore, more evidence from China is needed.  
30  
31

32  
33 Although large-scale studies on AMI or acute coronary syndrome (ACS), such as  
34  
35 CPACS, CCC, China-PEACE, and CAMI, have been conducted in China, none  
36  
37 focused on establishing a regional STEMI emergency care network [7 10-12]. Serial  
38  
39 documents issued by the National Health Commission of China provided favorable  
40  
41 government support and further emphasized the importance of the administrative  
42  
43 departments of health care at all levels in strengthening the construction of the  
44  
45 regional emergency medical treatment system [13-15].  
46  
47  
48  
49

50  
51 This study aimed to introduce the protocol of a 10-year project named as China  
52  
53 STEMI Care Project (CSCAP), including objective, organization, procedures, data  
54  
55 collection, assessment and feedback, and updates. The results provided important  
56  
57

1  
2  
3 evidence for the improvement in STEMI care within the whole region and also useful  
4  
5 information when building up STEMI network in other similar regions.  
6  
7  
8  
9

## 10 **Methods and analysis**

### 11 **Objectives**

12  
13  
14  
15 CSCAP aimed to build up different types of integrated regional STEMI care  
16 network covering the whole city region, city population, and disease processes  
17 according to different conditions nationwide. It also aimed to improve the awareness  
18 of public health and emergency treatment for patients with STEMI, increase the ratio  
19 of reperfusion treatment, shorten the overall duration of myocardial ischemia, and  
20 implement standard secondary prevention to improve the long-term prognosis through  
21 the establishment and optimization of medical care assessment and feedback system  
22 with data support.  
23  
24  
25  
26  
27  
28  
29  
30  
31  
32  
33  
34

### 35 **Study design**

36  
37 CSCAP was a prospective, multicenter registry involving three stages. Phase 1 of  
38 CSCAP (CSCAP-1) focused on the in-hospital process optimization of primary  
39 percutaneous coronary intervention (PPCI) hospitals. Phase 2 of CSCAP (CSCAP-2)  
40 focused on the PPCI hospital-based regional STEMI transfer network construction  
41 with their adjacent non-PPCI hospitals and EMS. Phase 3 of CSCAP (CSCAP-3)  
42 focused on the whole-city STEMI care network construction by promoting chest pain  
43 center (CPC) accreditation (Figure 1). Systematic data collection, assessment of  
44 quality of care, and subsequent improvement were implemented throughout this study  
45  
46  
47  
48  
49  
50  
51  
52  
53  
54  
55  
56  
57  
58  
59  
60

1  
2  
3 to continuously improve the quality of care.  
4  
5

### 6 **Organizational framework**

7

8 CSCAP was established by the Chinese Physician Association and supported by  
9  
10 the National Health Commission of China in 2011. After collaborating with the  
11  
12 European Stent – Save a Life in CSCAP-3, China became its member country in 2017.  
13  
14 The project office and steering committee were set up for management and academic  
15  
16 support. Data management and statistical analyses were conducted by the School of  
17  
18 Public Health of Peking University.  
19  
20  
21

### 22 **Site selection**

23

24 CSCAP included 18 provinces (Anhui, Fujian, Gansu, Guangdong, Guangxi,  
25  
26 Hainan, Hebei, Heilongjiang, Henan, Hubei, Jiangsu, Liaoning, Shandong, Shanxi,  
27  
28 Sichuan, and Zhejiang), 4 municipalities (Beijing, Chongqing, Shanghai, Tianjin, and  
29  
30 Yunnan), and 2 autonomous regions (Xinjiang and Inner Mongolia) because of the  
31  
32 high incidence of STEMI in North China and economic issues in South China (Figure  
33  
34 2).  
35  
36  
37  
38  
39

40 A total of 53 tertiary hospitals qualified for PPCI in 14  
41  
42 provinces/municipalities/autonomous regions of China enrolled in CSCAP-1  
43  
44 (Appendix table 1). These hospitals were selected because they were at the top level  
45  
46 in their city and potentially a hub for regional network construction in CSCAP-2. A  
47  
48 total of 241 PCI hospitals with hundreds of adjunct non-PCI hospitals from 24  
49  
50 provinces/municipalities/autonomous regions were selected to establish the regional  
51  
52 STEMI care network in CSCAP-2 (Appendix table 1). A total of seven cities (Harbin,  
53  
54  
55  
56  
57

1  
2  
3 Hangzhou, Nanning, Qingdao, Shenzhen, Suzhou, and Taiyuan) according to two  
4  
5  
6 different EMS types were selected to build up the whole-city STEMI care network in  
7  
8  
9 CSCAP-3 (Figure 2).

### 10 **Patient enrollment and follow-up**

11  
12  
13 Patients with STEMI who met with the third AMI definition in 2012 and the  
14  
15 Chinese STEMI diagnosis and treatment guidelines were enrolled [16 17]. All patients  
16  
17 received routine clinical assessments and treatments without any experimental  
18  
19 intervention. The study was reviewed and approved by the Ethics Board at Peking  
20  
21 University First Hospital.  
22  
23

24  
25 In CSCAP-1, a total of 4191 patients admitted to hospitals, with symptom onset  
26  
27 within 12 h regardless of whether receiving reperfusion or symptom onset within  
28  
29 12–24 h needing PPCI, were enrolled consecutively in 2012. In CSCAP-2, a total of  
30  
31 20,810 patients with STEMI occurrence within 30 days regardless of reperfusion were  
32  
33 enrolled consecutively from PPCI hospitals three times at 6-month intervals during  
34  
35 2015 to 2017. In CSCAP-3, a total of 30 hospitalized patients with symptom onset  
36  
37 within 30 days were enrolled consecutively from each hospital every 3 months.  
38  
39 Patients with STEMI were enrolled consecutively from the whole network units,  
40  
41 including both PCI and non-PCI hospitals. The patients who survived after hospital  
42  
43 discharge were also followed up for 1 year.  
44  
45  
46  
47  
48  
49

### 50 **Procedures**

51  
52 The treatment flow of the patients with STEMI was based on the STEMI protocol  
53  
54 of the Announcement of Improving Medical Emergency Treatment Performance of  
55  
56  
57

1  
2  
3  
4 Acute Cardiovascular and Cerebrovascular Diseases released by the National Health  
5  
6 Commission of China in 2015 [15]. Briefly, this flow chart included 1 center (EMS),  
7  
8 2 types of hospitals (PCI and non-PCI), 3 types of transport methods (EMS to hospital,  
9  
10 bypass emergency department (ED), and interhospital), and 11 clinical pathways.  
11  
12 Different clinical pathways were selected to execute the optimal emergency treatment  
13  
14 based on the visiting time, method, and hospital level (Figure 3). According to typical  
15  
16 ischemic symptoms and electrocardiogram (ECG), the procedure was started without  
17  
18 results of myocardial biomarkers in case of delay.  
19  
20  
21

### 22 23 **Data collection and management**

24  
25 CSCAP collected data of all treatment flow, which were entered into a self-built  
26  
27 electronic database together with two existing databases of both CPC accreditation  
28  
29 and national PCI registry by trained clinical research coordinators and clinicians in  
30  
31 each hospital. Variables included general information of patients, prehospital EMS  
32  
33 treatment, in-hospital management, and follow-up management (Table 1). The data  
34  
35 quality was monitored, and suspicious contents by review mainly included missing,  
36  
37 outlier, and logical error data. When all problems were resolved, the database was  
38  
39 locked for statistical analysis.  
40  
41  
42  
43

### 44 45 **Key performance index for evaluating the quality of medical care**

46  
47 CSCAP mainly used the describing method to rank data quality and medical  
48  
49 quality. Continuous variables were described as mean (standard deviation) or median  
50  
51 (interquartile range), while categorical variables were described as percentage. The  
52  
53 multivariate regression model was used to evaluate the factors related to the  
54  
55  
56  
57

1  
2  
3  
4 assessment of medical quality. The Cox model was used to analyze the association  
5  
6 between the exposures and medical outcomes. A *P* value <0.05 was defined as a  
7  
8 significant difference. All analyses were performed using R  
9  
10 (<http://www.R-project.org>).  
11  
12

13 A total of 13 primary key performance indexes (KPIs) were selected for medical  
14  
15 quality evaluation based on different roles of EMS and hospitals with or without PCI  
16  
17 capability in STEMI treatment (Table 2). The circular  
18  
19 enrollment–evaluation–improvement method was implemented in both CSCAP-2 and  
20  
21 CSCAP-3. Comparison of KPIs with itself and others was conducted for tailed  
22  
23 improvements. Quality feedback report contained each KPI of the affiliation and its  
24  
25 ranking among all affiliations and all regional affiliations, which was presented as  
26  
27 location in quartile interval without ranking results of others.  
28  
29  
30  
31  
32  
33  
34

### 35 **Ethics and dissemination**

36  
37 CSCAP was the first prospective registry study on the establishment of STEMI  
38  
39 regional care network in China step by step, covering the whole city, population, and  
40  
41 treatment processes. Some large-scale ACS registry studies have been carried out in  
42  
43 China, such as the CCC program focusing on the in-hospital treatment of ACS [11],  
44  
45 the CPACS study focusing on the ACS clinical pathway [10], the CAMI study  
46  
47 focusing on the hospital treatment of STEMI and non-ST-elevation myocardial  
48  
49 infarction (NSTEMI) [12], and the China-PEACE study (retrospective study) [7].  
50  
51 Different from these studies, CSCAP prospectively collected data to analyze the  
52  
53  
54  
55  
56  
57  
58  
59  
60

1  
2  
3 whole process of STEMI treatment and then provided feedback to units for  
4  
5  
6 problem-guided improvement. This study helped understand the condition of STEMI  
7  
8 care in China extensively, the gap and differences with other countries, and the issues  
9  
10 and solutions, leading to optimized clinical practice and improved medical quality.  
11  
12

13 An integrated regional network mainly contains PCI hospital, non-PCI hospital,  
14  
15 and EMS. The medical system and patient factors together determine the delay in  
16  
17 STEMI emergency treatment [18]. Three major types of EMS exist in China: (1)  
18  
19 independent-type EMS, which has its own ambulances, (2) command-type EMS,  
20  
21 which does not have its own ambulances and uses local hospital ambulances, and (3)  
22  
23 affiliate-type EMS, which is based in hospitals and uses its ambulances. On the basis  
24  
25 of these comprehensive situations, patients may not be transported to the optimal  
26  
27 hospital to receive effective treatment in the shortest period because of incomplete  
28  
29 communication [19]. Thus, different types of prehospital information transmission  
30  
31 should be considered accordingly for hospital alert and rapid and accurate transport.  
32  
33  
34  
35  
36  
37

38 Optimizing the in-hospital green channel can significantly shorten the  
39  
40 door-to-balloon (D2B) duration, while establishing a CPC was one of the most  
41  
42 important methods [20 21]. Integration of multiple resources can help in early  
43  
44 diagnosis, risk stratification, and treatment of STEMI and other acute chest  
45  
46 pain-related diseases, thus improving efficiency, prognosis, and medical burden.  
47  
48 Traditional CPC focuses on the optimization and integration of the in-hospital green  
49  
50 channel aimed to shorten D2B time in STEMI care. The concept of a modern CPC in  
51  
52 STEMI care expands to establish an effective regional emergency treatment network  
53  
54  
55  
56  
57  
58  
59  
60



1  
2  
3 aimed to shorten the total ischemia duration, thus maximizing the advantage of  
4 reperfusion therapy. Medical system and patient factors together determine the delay  
5  
6 of STEMI emergency treatment [18]. Public education for self-awareness  
7  
8 improvement, which is one of the elements of the CPC construction, could enable  
9  
10 patients to seek medical assistance promptly in case of suspected myocardial  
11  
12 infarction, accept timely reperfusion without hesitation, and adhere to primary and  
13  
14 secondary prevention. CPC independent accreditation in China was initiated in 2013  
15  
16 with support from the National Health and Family Planning Commission and directed  
17  
18 by the Chinese Society of Cardiology and the Chinese Physician Association. Two  
19  
20 types of CPC accreditation standards were developed [22 23], which were separately  
21  
22 applicable to PCI hospitals and non-PCI hospitals or to relatively small PCI hospitals  
23  
24 not able to reach the PCI scale. The first standard focused on the improvement in the  
25  
26 emergency PCI capacity and efficiency, while the second one focused on the  
27  
28 improvement in thrombolysis and referral capacity to PPCI hospitals. Currently, 460  
29  
30 accredited CPCs and 2721 hospitals were in the waiting list in China by April 2018.  
31  
32  
33  
34  
35  
36  
37  
38  
39

40 Rapid identification of STEMI and referral to a hospital without PCI certification  
41  
42 are also important segments in establishing a regional STEMI emergency treatment  
43  
44 system. A large number of patients with coronary heart disease in China are  
45  
46 distributed in rural areas, and the mortality of AMI in these regions surpasses the  
47  
48 urban areas. Although PPCI is the most effective treatment for STEMI, its  
49  
50 implementation is difficult in most of the primary hospitals, which are limited by  
51  
52 medical condition, geographic location, and techniques. On the basis of these  
53  
54  
55  
56  
57  
58  
59  
60

1  
2  
3 conditions of China, early thrombolysis and transfer PCI strategy are the priorities in  
4  
5 most of the primary hospitals. Therefore, establishing an effective regional  
6  
7 collaboration emergency treatment network to improve the treatment quality of  
8  
9 STEMI is extremely important.  
10  
11

12  
13 The National Cardiovascular Data Registry (NCDR), established since 1997, has  
14  
15 become the basis for project implementation and quality evaluation as well as  
16  
17 research center medical quality improvement in the United States. It has a positive  
18  
19 impact on the clinical practice, medical payment, clinical research, and government  
20  
21 decision-making [24 25]. The present study referred to the NCDR model to optimize  
22  
23 the STEMI medical quality and established an assessment and feedback system for  
24  
25 KPIs, such as efficiency of emergency transport, efficiency of hospital treatment with  
26  
27 various levels, and cooperation between network units. For KPI selection, PPCI  
28  
29 hospitals focused on the improvement in the emergency PCI capacity and efficiency;  
30  
31 non-PPCI hospitals focused on the improvement in rapid diagnosis, thrombolysis, and  
32  
33 referral capacity to PPCI hospitals; and EMS focused on the improvement in  
34  
35 information transmission to alert hospitals early for rapid and accurate transport.  
36  
37  
38  
39  
40  
41

42 Since China has a large number of patients, its cardiovascular clinical data  
43  
44 resource is the largest in the world. However, Chinese guidelines lack high-quality  
45  
46 evidence. Clinical practice has demonstrated that overseas guidelines and evidence  
47  
48 may not be applicable to the prevention and treatment of cardiovascular diseases in  
49  
50 the Chinese population [26]. CSCAP established a database platform for the STEMI  
51  
52 whole-treatment process, including primary prevention, emergency treatment,  
53  
54  
55  
56  
57

1  
2  
3 in-hospital treatment, and secondary prevention. It was a real-world registry study and  
4 provided additional information. For example, this study evaluated the compliance of  
5 other related cardiovascular guidelines in real clinical practice, tracked the efficacy  
6 and side effects of novel drugs and devices, provided evidence for new guidelines,  
7 and compared differences among various hospitals and regions.  
8  
9

10  
11  
12  
13  
14  
15  
16 However, the present study had some limitations. First, CSCAP was expected to  
17 record clinical information of the full-treatment procedure of STEMI, which involved  
18 many affiliations and departments. Considering the real situation in ED, many time  
19 points of the KPIs could not be recorded manually on time, which might have led to  
20 missing and inaccurate data. Mobile device app could record the time variables  
21 through a simple click and completed the prehospital ECG transmission. Additionally,  
22 the auto capture of data gradually became possible to resolve this issue. All of these  
23 were considered in this study. Second, hospitals in CSCAP-1 and CSCAP-2 were not  
24 strictly selected according to the ratio of PPCI, which might be because of lack of  
25 representatives to some degree. The selected hospitals with good conditions were  
26 better than the average level in their region. However, the first two phases of CSCAP  
27 were not only a description of the current situation of STEMI treatment, but a project  
28 to improve the quality of medical care. Therefore, high-level PCI hospitals were  
29 suitable to be used as core centers to establish the regional network. These successful  
30 experiences might have referral relevance to hospitals in the same region but outside  
31 this study, which might be useful for the whole-city network construction in  
32 CSCAP-3.  
33  
34  
35  
36  
37  
38  
39  
40  
41  
42  
43  
44  
45  
46  
47  
48  
49  
50  
51  
52  
53  
54  
55

1  
2  
3 Shortening of the overall ischemia duration and increase in the reperfusion  
4 treatment rate are critical issues and challenges in STEMI care. The integration and  
5 optimization of a systemic STEMI collaborative network with government support are  
6 urgent issues that need to be resolved in China. CSCAP, with the establishment of an  
7 intrinsic feedback and certification system, will provide important prospective  
8 information for the network construction from PPCI hospital-centered regional  
9 network to whole-city covered STEMI transfer network step by step to establish an  
10 optimal STEMI care system in China.  
11  
12  
13  
14  
15  
16  
17  
18  
19  
20  
21  
22  
23  
24

#### 25 **Authors' contributions**

26  
27  
28 Yan Zhang coordinated the study, assisted with data collection, performed data  
29 analysis, and drafted the manuscript. Bo Yu, Yaling Han, Jianan Wang, Lixia Yang,  
30 Zheng Wan, Zheng Zhang, Yuguo Chen, Xianghua Fu, Chuanyu Gao, Bao Li, Jiyan  
31 Chen, Ming Wu, Yitong Ma, Xingsheng Zhao, Yundai Chen, Hongbing Yan,  
32 Dingcheng Xiang, Weiyi Fang, and Junbo Ge carried out the data collection, and  
33 helped to draft the manuscript. Sameer Mehta and Christoph K participated in the  
34 design and helped to analyze data and draft the manuscript. Naber, Yong Huo, PI of  
35 the project, conceived and designed the project, helped to collect data and draft the  
36 manuscript. All authors reviewed the results and approved the final version of the  
37 manuscript.  
38  
39  
40  
41  
42  
43  
44  
45  
46  
47  
48  
49  
50  
51  
52  
53  
54  
55  
56  
57  
58  
59  
60

**Funding**

CSCAP was funded by Sanofi-Aventis, Abbott, and AstraZeneca.

**Conflicts of interest**

The authors declare no conflicts of interest.

**Acknowledgments**

The authors thank the members of the study team of all collaborative hospitals and emergency medical services. They are also grateful to the organizations Chinese Medical Doctor Association and China Cardiovascular Association and acknowledge the support provided by the National Health Commission and local governments in China.

**Patient consent**

Obtained.

**Ethics approval**

The study was reviewed and approved by the Ethics Board at Peking University First Hospital.

**Data sharing statement**

No additional data are available.

1  
2  
3  
4  
5  
6  
7  
8  
9  
10  
11  
12  
13  
14  
15  
16  
17  
18  
19  
20  
21  
22  
23  
24  
25  
26  
27  
28  
29  
30  
31  
32  
33  
34  
35  
36  
37  
38  
39  
40  
41  
42  
43  
44  
45  
46  
47  
48  
49  
50  
51  
52  
53  
54  
55  
56  
57  
58  
59  
60

For peer review only

## References

1. Stevens W, Peneva D, Li JZ, et al. Estimating the future burden of cardiovascular disease and the value of lipid and blood pressure control therapies in China. *BMC health services research* 2016;**16**:175.
2. *Report on cardiovascular disease in China*: Encyclopedia of China Publishing house, 2016.
3. O'Gara PT, Kushner FG, Ascheim DD, et al. 2013 ACCF/AHA guideline for the management of ST-elevation myocardial infarction: a report of the American College of Cardiology Foundation/American Heart Association Task Force on Practice Guidelines. *Circulation* 2013;**127**:e362-425.
4. Task Force on the management of ST-segment elevation myocardial infarction, Steg PG, James SK, et al. ESC Guidelines for the management of acute myocardial infarction in patients presenting with ST-segment elevation. *European heart journal* 2012;**33**:2569-619.
5. Eagle KA, Nallamothu BK, Mehta RH, et al. Trends in acute reperfusion therapy for ST-segment elevation myocardial infarction from 1999 to 2006: we are getting better but we have got a long way to go. *European heart journal* 2008;**29**:609-17.
6. Song L, Hu DY, Yan HB, et al. Influence of ambulance use on early reperfusion therapies for acute myocardial infarction. *Chinese medical journal* 2008;**121**:771-5.
7. Li J, Li X, Wang Q, et al. ST-segment elevation myocardial infarction in China

- 1  
2  
3 from 2001 to 2011 (the China PEACE-Retrospective Acute Myocardial  
4 Infarction Study): a retrospective analysis of hospital data. *Lancet*  
5  
6 2015;**385**:441-51.  
7  
8  
9
- 10 8. Jollis JG, Granger CB, Henry TD, et al. Systems of care for ST-segment-elevation  
11 myocardial infarction: a report From the American Heart Association's  
12 Mission: Lifeline. *Circulation. Cardiovascular quality and outcomes*  
13 2012;**5**:423-8.  
14  
15  
16  
17  
18  
19
- 20 9. Kristensen SD, Fajadet J, Di Mario C, et al. Implementation of primary angioplasty  
21 in Europe: stent for life initiative progress report. *EuroIntervention : journal of*  
22 *EuroPCR in collaboration with the Working Group on Interventional*  
23 *Cardiology of the European Society of Cardiology* 2012;**8**:35-42.  
24  
25  
26  
27  
28  
29
- 30 10. Gao R, Patel A, Gao W, et al. Prospective observational study of acute coronary  
31 syndromes in China: practice patterns and outcomes. *Heart* 2008;**94**:554-60.  
32  
33  
34
- 35 11. Hao Y, Liu J, Liu J, et al. Rationale and design of the Improving Care for  
36 Cardiovascular Disease in China (CCC) project: A national effort to prompt  
37 quality enhancement for acute coronary syndrome. *American heart journal*  
38 2016;**179**:107-15.  
39  
40  
41  
42  
43  
44
- 45 12. Xu H, Li W, Yang J, et al. The China Acute Myocardial Infarction (CAMI)  
46 Registry: A national long-term registry-research-education integrated platform  
47 for exploring acute myocardial infarction in China. *American heart journal*  
48 2016;**175**:193-201 e3.  
49  
50  
51  
52  
53  
54
- 55 13. Pre-hospital medical emergency management measures. *Chinese Village Medicine*  
56  
57  
58  
59  
60



- 2014:85-86. (In Chinese)
14. National Health Commission of China. Guiding Principles for Construction and Management of Chest Pain Center (Trial). 2017. (In Chinese)
15. National Health Commission of China. The Announcement of Improving Medical Emergency Treatment Performance of Acute Cardiovascular and Cerebrovascular Diseases. 2015. (In Chinese)
16. Thygesen K, Alpert JS, Jaffe AS, et al. Third universal definition of myocardial infarction. *Circulation* 2012;**126**:2020-35.
17. Chinese Society of Cardiology, Editorial board of Chinese Journal of Cardiology. Guidelines for the diagnosis and treatment of acute ST segment elevation myocardial infarction. *Chin J Cardiol* 2015;**43**:380-93.
18. Windecker S, Bax JJ, Myat A, et al. Future treatment strategies in ST-segment elevation myocardial infarction. *Lancet* 2013;**382**:644-57.
19. Ranasinghe I, Rong Y, Du X, et al. System barriers to the evidence-based care of acute coronary syndrome patients in China: qualitative analysis. *Circulation. Cardiovascular quality and outcomes* 2014;**7**:209-16.
20. Bradley EH, Herrin J, Wang Y, et al. Strategies for reducing the door-to-balloon time in acute myocardial infarction. *The New England journal of medicine* 2006;**355**:2308-20.
21. Graff LG, Dallara J, Ross MA, et al. Impact on the care of the emergency department chest pain patient from the chest pain evaluation registry (CHEPER) study. *The American journal of cardiology* 1997;**80**:563-8.

- 1  
2  
3  
4 22. China Chest Pain Center Accreditation Work Committee. Standard for Chinese  
5  
6 Chest Pain Center accreditation. *Chin J Intervent Cardiol* 2016;**24**:121-30.  
7  
8  
9 23. China Chest Pain Center Accreditation Work Committee. Standard for Chinese  
10  
11 Primary Chest Pain Center accreditation. *Chin J Intervent Cardiol*  
12  
13 2016;**24**:131-33.  
14  
15  
16 24. Diercks DB, Kontos MC, Chen AY, et al. Utilization and impact of pre-hospital  
17  
18 electrocardiograms for patients with acute ST-segment elevation myocardial  
19  
20 infarction: data from the NCDR (National Cardiovascular Data Registry)  
21  
22 ACTION (Acute Coronary Treatment and Intervention Outcomes Network)  
23  
24 Registry. *Journal of the American College of Cardiology* 2009;**53**:161-6.  
25  
26  
27  
28 25. Krim SR, Vivo RP, Krim NR, et al. Regional differences in clinical profile, quality  
29  
30 of care, and outcomes among Hispanic patients hospitalized with acute  
31  
32 myocardial infarction in the Get with Guidelines-Coronary Artery Disease  
33  
34 (GWTG-CAD) registry. *American heart journal* 2011;**162**:988-95 e4.  
35  
36  
37  
38 26. Huo Y, Li J, Qin X, et al. Efficacy of folic acid therapy in primary prevention of  
39  
40 stroke among adults with hypertension in China: the CSPPT randomized  
41  
42 clinical trial. *Jama* 2015;**313**:1325-35.  
43  
44  
45  
46  
47  
48  
49  
50  
51  
52  
53  
54  
55  
56  
57  
58  
59  
60

**Table 1. CSCAP data elements**

| Category                     | Example elements                                                                                                                                                                                                                                                                                                                                                      |
|------------------------------|-----------------------------------------------------------------------------------------------------------------------------------------------------------------------------------------------------------------------------------------------------------------------------------------------------------------------------------------------------------------------|
| Patient baseline information | Demographics (age, sex, ethnicity, occupation, marriage status, medical insurance, and status)<br>Risk factors (smoking status, BMI, hypertension, diabetes, dyslipidemia, peripheral artery disease, prior MI history, prior stroke history, and prior revascularization)<br>Clinical presentation (blood pressure, heart rate, and cardiac function classification) |
| Prehospital information      | Patient (symptoms, symptom onset time, first medical contact method/time, and hospital approaching method)<br>EMS (response time, transfer process, first ECG time, ECG transmission ratio, and bypass ED)<br>Non-PCI hospital (admission time, first ECG time, diagnosis process, reperfusion and other treatment, DI-DO time, and transfer process)                 |
| PCI hospital information     | Reperfusion (primary PCI, thrombolysis, pharmacoinvasive method and postthrombolysis PCI, indication/contraindication, and nonreperfusion reasons)<br>Treatment delay (hospital approaching method, ED/chest pain center, bypass ED, admission time, first ECG time, catheter lab ready time, D2B, D2N, FMC2B, total ischemic time, and                               |

1  
2  
3 reasons of delay)

4  
5  
6 PCI procedures (operative route, coronary angiography  
7  
8 results, aspiration, culprit vessels, aspiration, stent, and  
9  
10 elective PCI)

11  
12  
13 Thrombolytic procedures (thrombolytic agent, dose, and  
14  
15 outcome)

16  
17  
18 Medications (loading dose DAPT/statin, antiplatelets,  
19  
20  $\beta$ -blockers, statin, ACEI/ARB, GP IIb/IIIa inhibitor, and  
21  
22 anticoagulant with dose and contraindication information)

23  
24  
25 Laboratory results (Troponin, CK-MB, creatinine,  
26  
27 hemoglobin, HbA1C, glucose, BNP, NT-proBNP, lipids, and  
28  
29 UCG)

30  
31  
32 Discharge (diagnosis, in-hospital duration, cost, and  
33  
34 medications)

35  
36  
37 Outcomes (death, non-fatal reinfarction, bleeding, nonfatal  
38  
39 stroke, revascularization, and mechanical complication)

40  
41  
42 Follow-up and management Presentation status (symptom, cardiac function classification,  
43  
44 blood pressure, heart rate, and follow-up on time ratio)

45  
46  
47 Laboratory results (lipid profiles, glucose traits, HbA1c,  
48  
49 creatinine, hemoglobin, BNP, NT-proBNP, ECG, and UCG)

50  
51  
52 Medications (antiplatelets,  $\beta$ -blockers, statin, and ACEI/ARB)

53  
54  
55 Risk factor control rate (BP, lipid, glucose, and smoking  
56

1  
2  
3  
4 cessation)Outcomes (death, nonfatal reinfarction, stroke,  
5  
6 revascularization, rehospitalization due to unstable angina  
7  
8 pectoris, heart failure or other cardiovascular reasons, and  
9  
10  
11 bleeding)  
12

---

13 ACEI, Angiotensin-converting enzyme inhibitor; ARB, angiotensin receptor blocker;  
14  
15 BMI, body mass index; BNP, brain natriuretic peptide; CK-MB, creatine kinase MB  
16  
17 isoenzyme; DAPT, dual antiplatelet therapy; D2B, door to balloon; D2N, door to  
18  
19 needle; DI-DO, door in-door out; ECG, electrocardiograph; ED, emergency  
20  
21 department; EMS, emergency medical service; FMC2B, first medical contact to  
22  
23 balloon; GP IIb/IIIa, glycoprotein IIb/IIIa; HbA1c, glycosylated hemoglobin A1c; MI,  
24  
25 myocardial infarction; NT-ProBNP, N-terminal pro-brain natriuretic peptide; PCI,  
26  
27 percutaneous coronary intervention; UCG, ultrasound cardiogram.  
28  
29  
30  
31  
32  
33  
34  
35  
36  
37  
38  
39  
40  
41  
42  
43  
44  
45  
46  
47  
48  
49  
50  
51  
52  
53  
54  
55  
56  
57  
58  
59  
60

**Table 2. Primary performance measures for medical care quality evaluation**

---

**Primary performance measures**

---

**Prehospital care**

Symptom onset to arrival in hospital (min)

Hospital admission ratio via ambulance (%)

Prehospital ECG transmission ratio (%)

Bypass ED ratio in patients with symptom onset within 12 h (%)

**Reperfusion**

Overall reperfusion ratio (%)

Thrombolysis ratio in patients with symptom onset within 12 h (%)

Primary PCI ratio in patients with symptom onset within 12 h (%)

D2B in patients with symptom onset within 12 h (min)

D2N in patients with symptom onset within 12 h (min)

**Discharge**Usage of both DAPT, statin,  $\beta$  blocker, and ACEI/ARB in patients without contraindication (%)**Outcomes**

In-hospital mortality (%)

**Follow-up and management**

1-Year on-time follow-up ratio (%)

1-Year MACE (%) including mortality, non-fatal myocardial infarction, non-fatal stroke, hospitalization due to heart failure or acute coronary syndrome, etc.

---

ACEI, Angiotensin-converting enzyme inhibitor; ARB, angiotensin receptor blocker;

1  
2  
3 DAPT, dual antiplatelet therapy; D2B, door to balloon; D2N, door to needle; ECG,  
4  
5 electrocardiogram; ED, emergency department; PCI, percutaneous coronary  
6  
7 intervention; MACE, major adverse cardiovascular event.  
8  
9  
10  
11  
12  
13  
14  
15  
16  
17  
18  
19  
20  
21  
22  
23  
24  
25  
26  
27  
28  
29  
30  
31  
32  
33  
34  
35  
36  
37  
38  
39  
40  
41  
42  
43  
44  
45  
46  
47  
48  
49  
50  
51  
52  
53  
54  
55  
56  
57  
58  
59  
60

For peer review only

1  
2  
3  
4  
5  
6  
7  
8  
9  
10  
11  
12  
13  
14  
15  
16  
17  
18  
19  
20  
21  
22  
23  
24  
25  
26  
27  
28  
29  
30  
31  
32  
33  
34  
35  
36  
37  
38  
39  
40  
41  
42  
43  
44  
45  
46  
47  
48  
49  
50  
51  
52  
53  
54  
55  
56  
57  
58  
59  
60

### Figure legends

Figure 1. CSCAP whole-city STEMI care network construction.

Figure 2. Geographic distribution of CSCAP.

Figure 3. CSCAP STEMI care flow chart.

For peer review only



1  
2  
3  
4  
5  
6  
7  
8  
9  
10  
11  
12  
13  
14  
15  
16  
17  
18  
19  
20  
21  
22  
23  
24  
25  
26  
27  
28  
29  
30  
31  
32  
33  
34  
35  
36  
37  
38  
39  
40  
41  
42  
43  
44  
45  
46  
47  
48  
49  
50  
51  
52  
53  
54  
55  
56  
57  
58  
59  
60

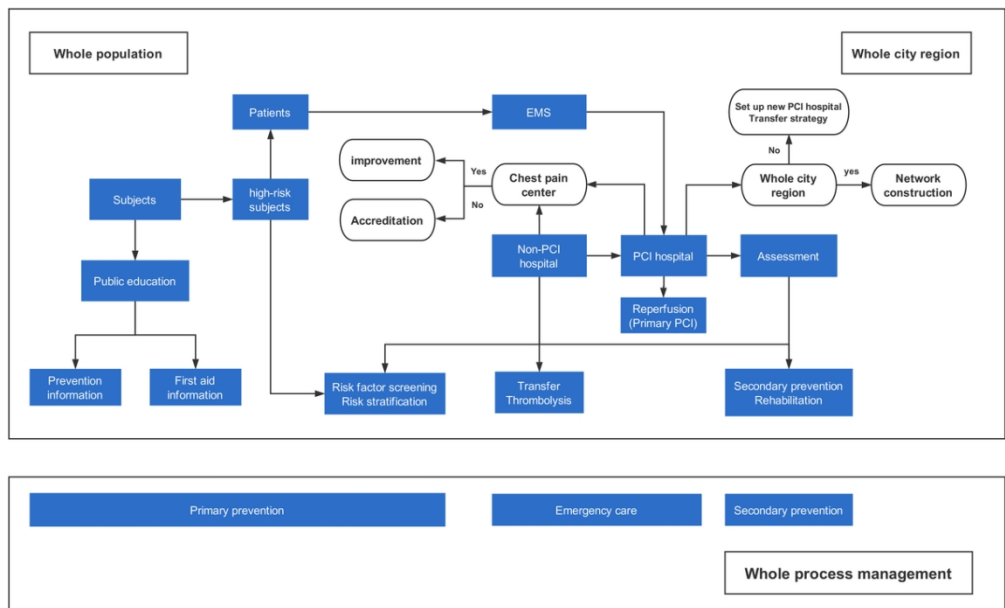

CSCAP whole-city STEMI care network construction.

102x62mm (300 x 300 DPI)

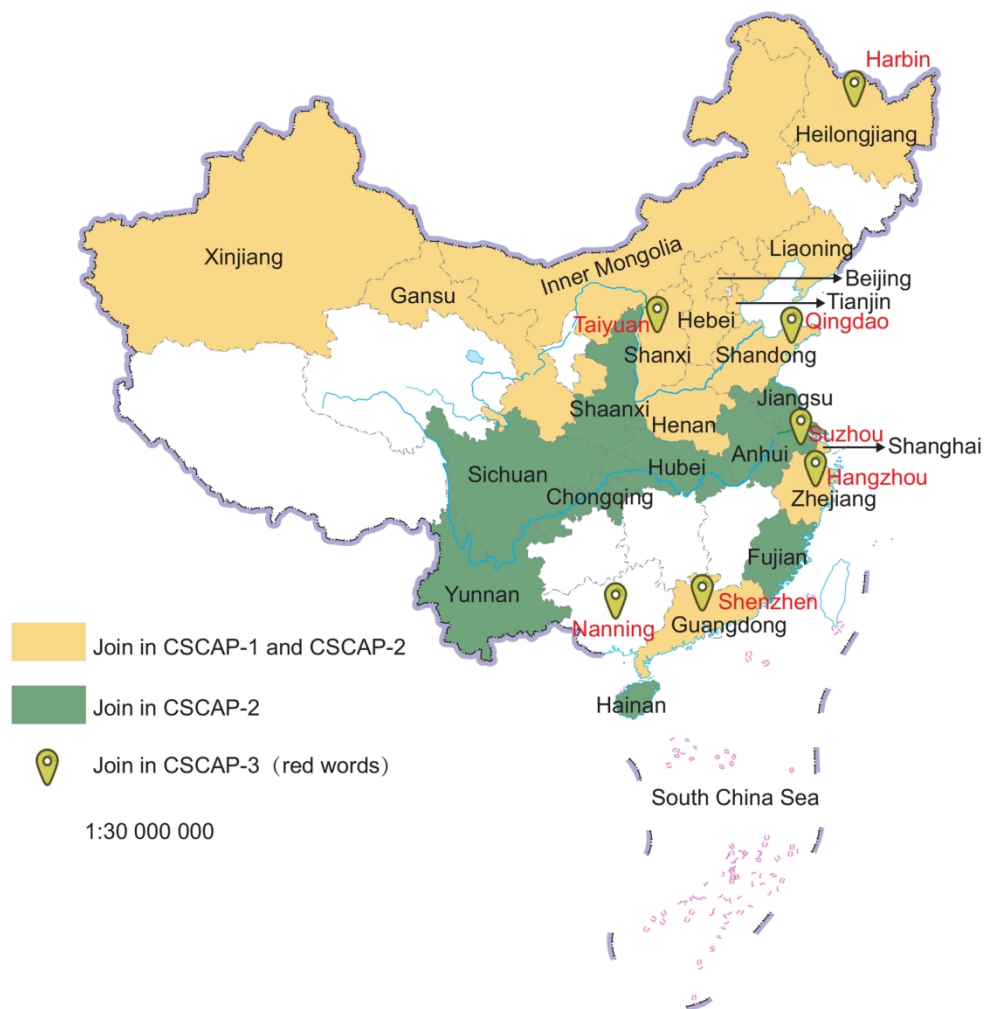

Geographic distribution of CSCAP

170x170mm (300 x 300 DPI)

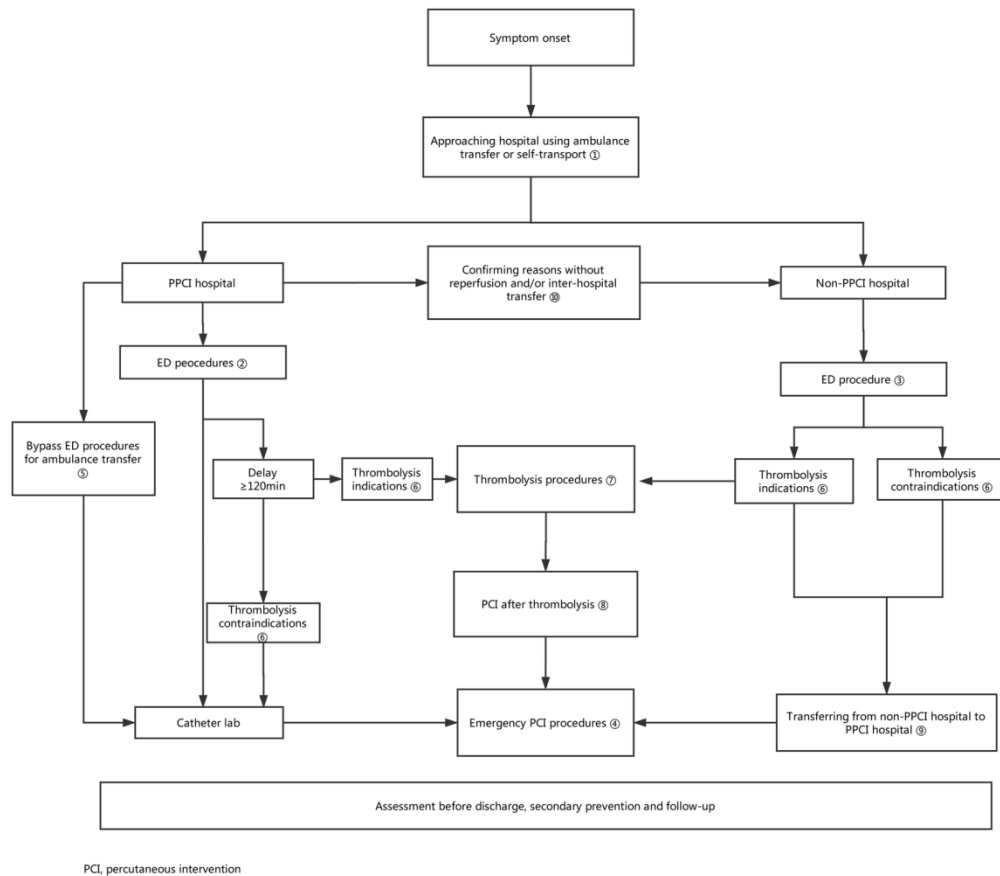

CSCAP STEMI care flow chart.

148x130mm (300 x 300 DPI)

**Appendix table 1 Complete list of PCI hospitals participat**

| <b>Hospital</b>                                                     | <b>Province/Municipality/</b> |
|---------------------------------------------------------------------|-------------------------------|
| Chizhou people's hospital                                           | Anhui                         |
| Taihe County People's Hospital                                      | Anhui                         |
| Anhui Provincial Hospital                                           | Anhui                         |
| Maanshan Central Hospital                                           | Anhui                         |
| Beijing Anzhen Hospital#                                            | Beijing                       |
| Beijing Chao-Yang Hospital#                                         | Beijing                       |
| Chinese PLA General Hospital   Medical School of Chinese PLA*       | Beijing                       |
| General Hospital of Armed Police Forces*                            | Beijing                       |
| General Hospital of Beijing Military Command of PLA*                | Beijing                       |
| Navy General Hospital                                               | Beijing                       |
| Peking University First Hospital#                                   | Beijing                       |
| Peking University People's Hospital#                                | Beijing                       |
| Peking University Shougang Hospital#                                | Beijing                       |
| Peking University Third Hospital#                                   | Beijing                       |
| The 306th Hospital of PLA                                           | Beijing                       |
| The 309th Hospital of Chinese People's Liberation Army              | Beijing                       |
| Daping Hospital,Research Institute of Surgery Third Military Medic  | Chongqing                     |
| Southwest Hospital                                                  | Chongqing                     |
| Xinqiao Hospital,Research Institute of Surgery Third Military Medi  | Chongqing                     |
| Fuzhou General Hospital of Nanjing Military Command                 | Fujian                        |
| Jiuquan people's Hospital of Gansu Province                         | Gansu                         |
| Lanzhou General Hospital of Lanzhou Military Command                | Gansu                         |
| The First Hospital of Lanzhou University*                           | Gansu                         |
| The First Hospital of Tianshui                                      | Gansu                         |
| Dongguan Kanghua Hospital                                           | Guangdong                     |
| The Third People's Hospital of Dongguan                             | Guangdong                     |
| The First People's Hospital of Shunde                               | Guangdong                     |
| First Affiliated Hospital of Sun Yat-sen University#                | Guangdong                     |
| General Hospital of Guangzhou Military Command of PLA               | Guangdong                     |
| Guangdong General Hospital of Armed Police Force                    | Guangdong                     |
| Guangdong General Hospital*                                         | Guangdong                     |
| Guangzhou Red Cross Hospital#                                       | Guangdong                     |
| Nanfang Hospital                                                    | Guangdong                     |
| Wuhan General Hospital of Guangzhou Military Command                | Guangdong                     |
| Maoming Hospital of TCM                                             | Guangdong                     |
| Maoming People's Hospital                                           | Guangdong                     |
| Qingyuan people's Hospital                                          | Guangdong                     |
| Shantou Central Hospital                                            | Guangdong                     |
| The First Affiliated Hospital of Shantou University Medical College | Guangdong                     |
| Yuebei People's Hospital                                            | Guangdong                     |
| Shenzhen People's Hospital                                          | Guangdong                     |
| Sun yat-sen Cardiovascular Hospital of Shenzhen*                    | Guangdong                     |
| The Fourth People's Hospital of Shenzhen                            | Guangdong                     |
| Affiliated Hospital of Guangdong Medical University                 | Guangdong                     |
| Danzhou People's Hospital                                           | Hainan                        |
| Haikou people's Hospital                                            | Hainan                        |

|    |                                                                     |              |
|----|---------------------------------------------------------------------|--------------|
| 1  |                                                                     |              |
| 2  | Hainan General Hospital                                             | Hainan       |
| 3  | Hainan Provincial Nong Ken Hospital                                 | Hainan       |
| 4  | The First Affiliated Hospital of Hainan Medical University          | Hainan       |
| 5  | Hainan Branch of PLA General Hospital                               | Hainan       |
| 6  | Hainan Third People's Hospital                                      | Hainan       |
| 7  | Sanya People's Hospital                                             | Hainan       |
| 8  | Affiliated Hospital of Hebei University                             | Hebei        |
| 9  | Baoding Second Central Hospital                                     | Hebei        |
| 10 | the First Central Hospital of Baoding City                          | Hebei        |
| 11 | Cangzhou Central Hospital*                                          | Hebei        |
| 12 | General Hospital of North China Petroleum Administration Bureau     | Hebei        |
| 13 | Affiliated Hospital of Chengde Medical College                      | Hebei        |
| 14 | Chengde Central Hospital                                            | Hebei        |
| 15 | Handan Central Hospital                                             | Hebei        |
| 16 | Handan First Hospital                                               | Hebei        |
| 17 | Harrison international Heping Hospital                              | Hebei        |
| 18 | Hengshui Cardiovascular Hospital                                    | Hebei        |
| 19 | Langfang Fourth People's Hospital                                   | Hebei        |
| 20 | Qinhuangdao First Hospital                                          | Hebei        |
| 21 | Bethune International Peace Hospital                                | Hebei        |
| 22 | Hebei General Hospital                                              | Hebei        |
| 23 | The Second Hospital of Hebei Medical University*                    | Hebei        |
| 24 | Kailuan General Hospital                                            | Hebei        |
| 25 | Tangshan Gongren Hospital*                                          | Hebei        |
| 26 | Xingtai People's Hospital                                           | Hebei        |
| 27 | Xingtai Third Hospital                                              | Hebei        |
| 28 | The Second Affiliated Hospital of Hebei North University            | Hebei        |
| 29 | Zhangjiakou First Hospital                                          | Hebei        |
| 30 | Zunhua people's Hospital                                            | Hebei        |
| 31 | The Fourth Hospital of Harbin Medical University*                   | Heilongjiang |
| 32 | The Second Affiliated Hospital of Harbin Medical University*        | Heilongjiang |
| 33 | Daqing Oilfield General Hospital*                                   | Heilongjiang |
| 34 | Longnan hospital in Daqing                                          | Heilongjiang |
| 35 | Greater Khingan Mountains Aera People's Hospital                    | Heilongjiang |
| 36 | Harbin First Hospital                                               | Heilongjiang |
| 37 | The Central Hospital of Jiamusi City                                | Heilongjiang |
| 38 | Mudanjiang Cardiovascular Hospital                                  | Heilongjiang |
| 39 | Mudanjiang City 2rd People's Hospital                               | Heilongjiang |
| 40 | The 3rd Affiliated Hospital of Qiqihar Medical University           | Heilongjiang |
| 41 | Tsitsihar First Hospital                                            | Heilongjiang |
| 42 | Shuangyashan Coal General Hospital                                  | Heilongjiang |
| 43 | The First Affiliated Hospital of Harbin Medical University#         | Helongjiang  |
| 44 | Anyang District Hospital                                            | Henan        |
| 45 | The People's Hospital of Hebi                                       | Henan        |
| 46 | Huaihe Hospital of Henan University                                 | Henan        |
| 47 | Kaifeng Central Hospital                                            | Henan        |
| 48 | Luohe Central Hospital                                              | Henan        |
| 49 | The First Affiliated Hospital of Henan University of Science and Te | Henan        |
| 50 |                                                                     |              |
| 51 |                                                                     |              |
| 52 |                                                                     |              |
| 53 |                                                                     |              |
| 54 |                                                                     |              |
| 55 |                                                                     |              |
| 56 |                                                                     |              |
| 57 |                                                                     |              |
| 58 |                                                                     |              |
| 59 |                                                                     |              |
| 60 |                                                                     |              |

|    |                                                                       |                |
|----|-----------------------------------------------------------------------|----------------|
| 1  |                                                                       |                |
| 2  | The Second Affiliated Hospital of Henan University of Science and     | Henan          |
| 3  | Nanyang Central Hospital                                              | Henan          |
| 4  | the Second People's Hospital of Pingdingshan                          | Henan          |
| 5  | Puyang Oilfield General Hospital                                      | Henan          |
| 6  | Puyang People's Hospital                                              | Henan          |
| 7  | First people's hospital of Shangqiu                                   | Henan          |
| 8  | Xinxiang Central Hospital                                             | Henan          |
| 9  | Xuchang Central Hospital                                              | Henan          |
| 10 |                                                                       |                |
| 11 | First Affiliated Hospital of Henan University of TCM                  | Henan          |
| 12 | Henan Province People's Hospital*                                     | Henan          |
| 13 | Henan Provincial Chest Hospital                                       | Henan          |
| 14 | The 7th people's hospital of Zhengzhou                                | Henan          |
| 15 | The First Affiliated Hospital of Zhengzhou University*                | Henan          |
| 16 | Zhengzhou first people's hospital                                     | Henan          |
| 17 | Zhumadian Central Hospital                                            | Henan          |
| 18 | Alxa League Central Hospital                                          | Inner Mongolia |
| 19 | Baotou Central Hospital*                                              | Inner Mongolia |
| 20 | The First Affiliated Hospital of Baotou Medical College               | Inner Mongolia |
| 21 | Bayannur Hospital                                                     | Inner Mongolia |
| 22 | Chifeng Municipal Hospital                                            | Inner Mongolia |
| 23 | The Affiliated Hospital of Chifeng University                         | Inner Mongolia |
| 24 | Inner Mongolia People's Hospital                                      | Inner Mongolia |
| 25 | The Affiliated Hospital of Inner Mongolia Medical University          | Inner Mongolia |
| 26 | Ordos Central Hosiptal                                                | Inner Mongolia |
| 27 | Tong Liao City Hospital                                               | Inner Mongolia |
| 28 | Ulanqab Central Hospital                                              | Inner Mongolia |
| 29 | People's Hospital Wuhai City                                          | Inner Mongolia |
| 30 | Xilingol League Hospital                                              | Inner Mongolia |
| 31 | Inner Mongolia Xing'an Meng People's Hospital                         | Inner Mongolia |
| 32 | Inner Mongolia Forestry General Hospital                              | Inner Mongolia |
| 33 | Ansteel Group Hospital                                                | Liaoning       |
| 34 | Dalian Municipal Central Hospital*                                    | Liaoning       |
| 35 | The First Affiliated Hospital of Dalian Medical University*           | Liaoning       |
| 36 | The Second Hospital of Dalian Medical University                      | Liaoning       |
| 37 | Dandong Central Hospital                                              | Liaoning       |
| 38 | General Hospital Under The Fushun Mining Affairs Bureau               | Liaoning       |
| 39 | Fuxin Central Hospital                                                | Liaoning       |
| 40 | Huludao Central Hospital                                              | Liaoning       |
| 41 | Jinzhou Central Hospital                                              | Liaoning       |
| 42 | The First Affiliated Hospital of Liaoning Medical University*         | Liaoning       |
| 43 | Shengjing Hospital of China Medicine University#                      | Liaoning       |
| 44 | The First Affiliated Hospital of Liaoning University of Traditional C | Liaoning       |
| 45 | The First Hospital of China Medical University                        | Liaoning       |
| 46 | The First Hospital of China Medical University                        | Liaoning       |
| 47 | The Fourth Hospital of China Medical University*                      | Liaoning       |
| 48 | The General Hospital of Shenyang Military                             | Liaoning       |
| 49 | The People's Hospital of Liaoning Province*                           | Liaoning       |
| 50 | The Second Affiliated Hospital of Shenyang Medical College            | Liaoning       |
| 51 |                                                                       |                |
| 52 |                                                                       |                |
| 53 |                                                                       |                |
| 54 |                                                                       |                |
| 55 |                                                                       |                |
| 56 |                                                                       |                |
| 57 |                                                                       |                |
| 58 |                                                                       |                |
| 59 |                                                                       |                |
| 60 |                                                                       |                |

|    |                                                                               |          |
|----|-------------------------------------------------------------------------------|----------|
| 1  |                                                                               |          |
| 2  | Tieling Central Hospital                                                      | Liaoning |
| 3  | Yingkou Central Hospital                                                      | Liaoning |
| 4  | Nanjing General Hospital                                                      | Nanjing  |
| 5  | Dezhou People's Hospital                                                      | Shandong |
| 6  | Dongying People's Hospital                                                    | Shandong |
| 7  | Jinan Central Hospital                                                        | Shandong |
| 8  | Qianfo Hill Hospital                                                          | Shandong |
| 9  | Qilu Hospital of Shandong University*                                         | Shandong |
| 10 | Shandong Provincial Hospital*                                                 | Shandong |
| 11 | The No.4 Hospital 1946 Jinan Shandong                                         | Shandong |
| 12 | The Second Hospital of Shandong University                                    | Shandong |
| 13 | Jining NO.1 People's Hospital                                                 | Shandong |
| 14 | The Affiliated Hospital of Jining Medical University*                         | Shandong |
| 15 | Liaocheng People's Hospital*                                                  | Shandong |
| 16 | The second People's Hospital Of Liaocheng                                     | Shandong |
| 17 | Linyi People's Hospital                                                       | Shandong |
| 18 | Qingdao Central Hospital                                                      | Shandong |
| 19 | Qingdao Municipal Hospital                                                    | Shandong |
| 20 | The Affiliated Hospital of Qingdao University*                                | Shandong |
| 21 | Taian City Central Hospital                                                   | Shandong |
| 22 | The Affiliated Hospital of Taishan Medical University                         | Shandong |
| 23 | Tengzhou Central People's Hospital                                            | Shandong |
| 24 | Anqiu City People's Hospital                                                  | Shandong |
| 25 | The Affiliated Hospital of Weifang Medical University                         | Shandong |
| 26 | Weifang People's Hospital                                                     | Shandong |
| 27 | Weifang Traditional Chinese Hospital                                          | Shandong |
| 28 | Changhai Hospital                                                             | Shanghai |
| 29 | Jinshan Hospital of Fudan University                                          | Shanghai |
| 30 | NO.3 People's Hospital Affiliated to Shanghai Jiao Tong University            | Shanghai |
| 31 | Renji Hospital Affiliated to Shanghai Jiao Tong University School of Medicine | Shanghai |
| 32 | Ruijin Hospital, Shanghai Jiaotong University                                 | Shanghai |
| 33 | Shanghai Changzheng Hospital                                                  | Shanghai |
| 34 | Shanghai Chest Hospital                                                       | Shanghai |
| 35 | Shanghai East Hospital                                                        | Shanghai |
| 36 | Shanghai Fengxian Central Hospital                                            | Shanghai |
| 37 | Shanghai General Hospital                                                     | Shanghai |
| 38 | Shanghai Gongli Hospital                                                      | Shanghai |
| 39 | Shanghai Jiading District Central Hospital                                    | Shanghai |
| 40 | Shanghai Jiao Tong University Affiliated Sixth People's Hospital              | Shanghai |
| 41 | Shanghai Minhang Central Hospital                                             | Shanghai |
| 42 | Shanghai ninth People's Hospital Affiliated to Shanghai Jiaotong University   | Shanghai |
| 43 | Shanghai Pudong New Area People's Hospital                                    | Shanghai |
| 44 | Shanghai Pudong New District Zhoupu Hospital                                  | Shanghai |
| 45 | Shanghai Putuo District Central Hospital                                      | Shanghai |
| 46 | The Fifth People's Affiliated Hospital of Fudan University                    | Shanghai |
| 47 | The Huashan Hospital of Fudan University                                      | Shanghai |
| 48 | The Tenth People's Hospital of Tongji University*                             | Shanghai |
| 49 | Tong Ren Hospital, Shanghai Jiao Tong University School of Medicine           | Shanghai |
| 50 |                                                                               |          |
| 51 |                                                                               |          |
| 52 |                                                                               |          |
| 53 |                                                                               |          |
| 54 |                                                                               |          |
| 55 |                                                                               |          |
| 56 |                                                                               |          |
| 57 |                                                                               |          |
| 58 |                                                                               |          |
| 59 |                                                                               |          |
| 60 |                                                                               |          |

|    |                                                                                          |          |
|----|------------------------------------------------------------------------------------------|----------|
| 1  |                                                                                          |          |
| 2  | Tongji Hospital                                                                          | Shanghai |
| 3  | Xin Hua Hospital Affiliated to Shanghai Jiao Tong University School of Medicine          | Shanghai |
| 4  | Zhongshan Hospital*                                                                      | Shanghai |
| 5  | General hospital of shanxi lu 'an mining (group) co., LTD                                | Shanxi   |
| 6  | Shanxi Luan Mining (Group) Co., Ltd. General Hospital                                    | Shanxi   |
| 7  | With the Coal Group General Hospital*                                                    | Shanxi   |
| 8  | Shanxi Fenyang Hospital                                                                  | Shanxi   |
| 9  | Shanxi Province Cardiovascular Disease Hospital*                                         | Shanxi   |
| 10 | Taiyuan Center Hospital                                                                  | Shanxi   |
| 11 | Taiyuan People's Hospital#                                                               | Shanxi   |
| 12 | Tangdu Hospital, The Fourth Military Medical University                                  | Shanxi   |
| 13 | Xijing Hospital, The Fourth Military Medical University                                  | Shanxi   |
| 14 | The First People's Hospital of Yangquan                                                  | Shanxi   |
| 15 | The First People's Hospital of JinZhong                                                  | Shanxi   |
| 16 | General Hospital of Chengdu Military Command of PLA                                      | Sichuan  |
| 17 | Affiliated Hospital of Chinese People's Armed Police Force Logistics Engineering College | Tianjin  |
| 18 | TEDA International Cardiovascular Hospital*                                              | Tianjin  |
| 19 | The 254th Hospital of Chinese People's Liberation Army                                   | Tianjin  |
| 20 | The 254th Hospital of PLA                                                                | Tianjin  |
| 21 | The Affiliated Hospital of Armed Police Medical College#                                 | Tianjin  |
| 22 | The Second Hospital of Tianjin Medical University*                                       | Tianjin  |
| 23 | Tianjin Baodi District People's Hospital                                                 | Tianjin  |
| 24 | Tianjin Beichen Hospital                                                                 | Tianjin  |
| 25 | Tianjin Chest Hospital*                                                                  | Tianjin  |
| 26 | Tianjin Fifth Central Hospital                                                           | Tianjin  |
| 27 | Tianjin First Central Hospital                                                           | Tianjin  |
| 28 | Tianjin Fourth Central Hospital                                                          | Tianjin  |
| 29 | Tianjin Jinghai hospital                                                                 | Tianjin  |
| 30 | Tianjin Jixain People's Hospital                                                         | Tianjin  |
| 31 | Tianjin Medical University General Hospital*                                             | Tianjin  |
| 32 | Tianjin People's Hospital*                                                               | Tianjin  |
| 33 | Tianjin Third Central Hospital                                                           | Tianjin  |
| 34 | Tianjin Xiqing Hospital                                                                  | Tianjin  |
| 35 | The First Affiliated Hospital of the Medical College, Shihezi University                 | Xinjiang |
| 36 | People's Hospital of Xinjiang Uygur Autonomous Region*                                   | Xinjiang |
| 37 | The First Affiliated Hospital of Xinjiang Medical University*                            | Xinjiang |
| 38 | The Second Affiliated Hospital of Xinjiang Medical University                            | Xinjiang |
| 39 | The Xinjiang Uygur Autonomous Region Hospital of traditional Chinese Medicine            | Xinjiang |
| 40 | Xinjiang Cardio-Cerebrovascular Disease Hospital                                         | Xinjiang |
| 41 | Urumqi General Hospital of Lanzhou Military Area Command                                 | Xinjiang |
| 42 | Kunming General Hospital of Chengdu Military Command of PLA                              | Yunnan   |
| 43 | Hangzhou First People's Hospital                                                         | ZheJiang |
| 44 | Sir Run Run Shaw Hospital of ZheJiang University School of Medicine                      | ZheJiang |
| 45 | The Affiliated Hospital of Hangzhou Normal University                                    | ZheJiang |
| 46 | The First Affiliated Hospital ZheJiang University*                                       | ZheJiang |
| 47 | The Second Affiliated Hospital of ZheJiang University School of Medicine                 | ZheJiang |
| 48 | ZheJiang Provincial Hospital of TCM                                                      | ZheJiang |
| 49 | ZheJiang Provincial People's Hospital                                                    | ZheJiang |
| 50 |                                                                                          |          |
| 51 |                                                                                          |          |
| 52 |                                                                                          |          |
| 53 |                                                                                          |          |
| 54 |                                                                                          |          |
| 55 |                                                                                          |          |
| 56 |                                                                                          |          |
| 57 |                                                                                          |          |
| 58 |                                                                                          |          |
| 59 |                                                                                          |          |
| 60 |                                                                                          |          |



|    |                                                                    |          |
|----|--------------------------------------------------------------------|----------|
| 1  |                                                                    |          |
| 2  | Jiaxing First Hospital                                             | ZheJiang |
| 3  | Jiaxing Second Hospital                                            | ZheJiang |
| 4  | Jinhua Central Hospital                                            | ZheJiang |
| 5  | Lishui Central Hospital                                            | ZheJiang |
| 6  | Ningbo City Medical Treatment Center Lihuili Hospital              | ZheJiang |
| 7  | Ningbo First Hospital                                              | ZheJiang |
| 8  | Ningbo No.2 Hospital                                               | ZheJiang |
| 9  |                                                                    |          |
| 10 | Quzhou People's Hospital of ZheJiang Province                      | ZheJiang |
| 11 | Shaoxing Second Hospital                                           | ZheJiang |
| 12 | Taizhou Central Hospital                                           | ZheJiang |
| 13 | Taizhou Hospital of ZheJiang Province                              | ZheJiang |
| 14 | People's Hospital of Wenzhou City                                  | ZheJiang |
| 15 | The First Affiliated Hospital of Wenzhou Medical University        | ZheJiang |
| 16 | The Second Affiliated Hospital and Yuying Children's Hospital of W | ZheJiang |
| 17 |                                                                    |          |
| 18 | Zhuji People's Hospital of ZheJiang Province                       | ZheJiang |
| 19 |                                                                    |          |
| 20 |                                                                    |          |
| 21 |                                                                    |          |
| 22 |                                                                    |          |
| 23 |                                                                    |          |
| 24 |                                                                    |          |
| 25 |                                                                    |          |
| 26 |                                                                    |          |
| 27 |                                                                    |          |
| 28 |                                                                    |          |
| 29 |                                                                    |          |
| 30 |                                                                    |          |
| 31 |                                                                    |          |
| 32 |                                                                    |          |
| 33 |                                                                    |          |
| 34 |                                                                    |          |
| 35 |                                                                    |          |
| 36 |                                                                    |          |
| 37 |                                                                    |          |
| 38 |                                                                    |          |
| 39 |                                                                    |          |
| 40 |                                                                    |          |
| 41 |                                                                    |          |
| 42 |                                                                    |          |
| 43 |                                                                    |          |
| 44 |                                                                    |          |
| 45 |                                                                    |          |
| 46 |                                                                    |          |
| 47 |                                                                    |          |
| 48 |                                                                    |          |
| 49 |                                                                    |          |
| 50 |                                                                    |          |
| 51 |                                                                    |          |
| 52 |                                                                    |          |
| 53 |                                                                    |          |
| 54 |                                                                    |          |
| 55 |                                                                    |          |
| 56 |                                                                    |          |
| 57 |                                                                    |          |
| 58 |                                                                    |          |
| 59 |                                                                    |          |
| 60 |                                                                    |          |

**ting in CSCAP-1 and CSCAP-2****City**

1  
2  
3  
4 Chizhou  
5 Fuyang  
6 Hefei  
7 Maanshan  
8 Beijing  
9 Beijing  
10 Beijing  
11 Beijing  
12 Beijing  
13 Beijing  
14 Beijing  
15 Beijing  
16 Beijing  
17 Beijing  
18 Beijing  
19 Beijing  
20 Beijing  
21 Beijing  
22 Chongqing  
23 Chongqing  
24 Chongqing  
25 Fuzhou  
26 Jiuquan  
27 Lanzhou  
28 Lanzhou  
29 Tianshui  
30 Dongguan  
31 Dongguan  
32 Foshan  
33 Guangzhou  
34 Guangzhou  
35 Guangzhou  
36 Guangzhou  
37 Guangzhou  
38 Guangzhou  
39 Guangzhou  
40 Guangzhou  
41 Guangzhou  
42 Maoming  
43 Maoming  
44 Qingyuan  
45 Shantou  
46 Shantou  
47 Shaoguan  
48 Shenzhen  
49 Shenzhen  
50 Shenzhen  
51 Zhanjiang  
52 Danzhou  
53 Haikou  
54  
55  
56  
57  
58  
59  
60

1  
2 Haikou  
3 Haikou  
4 Haikou  
5 Sanya  
6 Sanya  
7 Sanya  
8 Sanya  
9 Baoding  
10 Baoding  
11 Baoding  
12 Cangzhou  
13 Cangzhou  
14 Chengde  
15 Chengde  
16 Chengde  
17 Handan  
18 Handan  
19 Hengshui  
20 Hengshui  
21 Langfang  
22 Qinghuangdao  
23 Shijiazhuang  
24 Shijiazhuang  
25 Shijiazhuang  
26 Tangshan  
27 Tangshan  
28 Tangshan  
29 Xingtai  
30 Xingtai  
31 Xingtai  
32 Zhangjiakou  
33 Zhangjiakou  
34 Zunhua  
35 ?Harbin  
36 ?Harbin  
37 Daqing  
38 Daqing  
39 Daqing  
40 Greater Khingan  
41 Harbin  
42 Jiamusi  
43 Mudanjiang  
44 Mudanjiang  
45 Qiqihar  
46 Qiqihar  
47 Qiqihar  
48 Shuangyashan  
49 Harbin  
50 Anyang  
51 Hebi  
52 Kaifeng  
53 Kaifeng  
54 Kaifeng  
55 Luohe  
56 Luoyang  
57  
58  
59  
60

1  
2 Luoyang  
3 Nanyang  
4 Pingdingshan  
5 Puyang  
6 Puyang  
7 Shangqiu  
8 Xinxiang  
9 Xuchang  
10 Zhengzhou  
11 Zhengzhou  
12 Zhengzhou  
13 Zhengzhou  
14 Zhengzhou  
15 Zhengzhou  
16 Zhengzhou  
17 Zhengzhou  
18 Zhumadian  
19 Alxa League  
20 Baotou  
21 Baotou  
22 Bayannur  
23 Chifeng  
24 Chifeng  
25 Huhehaote  
26 Huhehaote  
27 Ordos  
28 Tongliao  
29 Ulanqab  
30 Wuhai  
31 Xilinhaote  
32 Xing'an Meng  
33 Yakeshi  
34 Anshan  
35 Dalian  
36 Dalian  
37 Dalian  
38 Dandong  
39 Fushun  
40 Fuxin  
41 Huludao  
42 Jinzhou  
43 Jinzhou  
44 Shenyang  
45 Shenyang  
46 Shenyang  
47 Shenyang  
48 Shenyang  
49 Shenyang  
50 Shenyang  
51 Shenyang  
52 Shenyang  
53 Shenyang  
54 Shenyang  
55 Shenyang  
56 Shenyang  
57  
58  
59  
60

- 1
- 2 Tieling
- 3 Yingkou
- 4 Nanjing
- 5 Dezhou
- 6 Dongying
- 7 Jinan
- 8 Jinan
- 9 Jinan
- 10 Jinan
- 11 Jinan
- 12 Jinan
- 13 Jinan
- 14 Jining
- 15 Jining
- 16 Liaocheng
- 17 Liaocheng
- 18 Linyi
- 19 Qingdao
- 20 Qingdao
- 21 Qingdao
- 22 Taian
- 23 Taian
- 24 Tengzhou
- 25 Weifang
- 26 Weifang
- 27 Weifang
- 28 Weifang
- 29 Shanghai
- 30 Shanghai
- 31 Shanghai
- 32 Shanghai
- 33 Shanghai
- 34 Shanghai
- 35 Shanghai
- 36 Shanghai
- 37 Shanghai
- 38 Shanghai
- 39 Shanghai
- 40 Shanghai
- 41 Shanghai
- 42 Shanghai
- 43 Shanghai
- 44 Shanghai
- 45 Shanghai
- 46 Shanghai
- 47 Shanghai
- 48 Shanghai
- 49 Shanghai
- 50 Shanghai
- 51 Shanghai
- 52 Shanghai
- 53 Shanghai
- 54 Shanghai
- 55 Shanghai
- 56 Shanghai
- 57
- 58
- 59
- 60

For peer review only

1  
2 Shanghai  
3 Shanghai  
4 Shanghai  
5 Changzhi  
6 Changzhi  
7 Datong  
8 Linfen  
9 Taiyuan  
10 Taiyuan  
11 Taiyuan  
12 Taiyuan  
13 Xi'an  
14 Xi'an  
15 Yangquan  
16 Yuci  
17 Chengdu  
18 Tianjin  
19 Tianjin  
20 Tianjin  
21 Tianjin  
22 Tianjin  
23 Tianjin  
24 Tianjin  
25 Tianjin  
26 Tianjin  
27 Tianjin  
28 Tianjin  
29 Tianjin  
30 Tianjin  
31 Tianjin  
32 Tianjin  
33 Tianjin  
34 Tianjin  
35 Tianjin  
36 Tianjin  
37 Tianjin  
38 Tianjin  
39 Shihezi  
40 Urumchi  
41 Urumchi  
42 Urumchi  
43 Urumchi  
44 Urumchi  
45 Urumchi  
46 Urumqi  
47 Kunming  
48 Hangzhou  
49 Hangzhou  
50 Hangzhou  
51 Hangzhou  
52 Hangzhou  
53 Hangzhou  
54 Hangzhou  
55 Hangzhou  
56 Hangzhou  
57  
58  
59  
60

- 1
- 2 Jiaxing
- 3 Jiaxing
- 4 Jinhua
- 5 Lishui
- 6 Ningbo
- 7 Ningbo
- 8 Ningbo
- 9 Ningbo
- 10 Quzhou
- 11 Shaoxing
- 12 Taizhou
- 13 Taizhou
- 14 Wenzhou
- 15 Wenzhou
- 16 Wenzhou
- 17 Wenzhou
- 18 Zhuji
- 19
- 20
- 21
- 22
- 23
- 24
- 25
- 26
- 27
- 28
- 29
- 30
- 31
- 32
- 33
- 34
- 35
- 36
- 37
- 38
- 39
- 40
- 41
- 42
- 43
- 44
- 45
- 46
- 47
- 48
- 49
- 50
- 51
- 52
- 53
- 54
- 55
- 56
- 57
- 58
- 59
- 60

For peer review only

# BMJ Open

## Protocol of the China STEMI Care Project (CSCAP): a 10-year project to improve quality of care by building up a regional STEMI care network

|                               |                                                                                                                                                                                                                                                                                                                                                                                                                                                                                                                                                                                                                                                                                                                                                                                                                                                                                                                                                                                                                                                                                                                                                                                                                                                                                                                                                                                                                                                                                                                                                                                                                                                                                                                                                                                                                                                                                                                                                                                                                                                                                                                                                                                                                                                                          |
|-------------------------------|--------------------------------------------------------------------------------------------------------------------------------------------------------------------------------------------------------------------------------------------------------------------------------------------------------------------------------------------------------------------------------------------------------------------------------------------------------------------------------------------------------------------------------------------------------------------------------------------------------------------------------------------------------------------------------------------------------------------------------------------------------------------------------------------------------------------------------------------------------------------------------------------------------------------------------------------------------------------------------------------------------------------------------------------------------------------------------------------------------------------------------------------------------------------------------------------------------------------------------------------------------------------------------------------------------------------------------------------------------------------------------------------------------------------------------------------------------------------------------------------------------------------------------------------------------------------------------------------------------------------------------------------------------------------------------------------------------------------------------------------------------------------------------------------------------------------------------------------------------------------------------------------------------------------------------------------------------------------------------------------------------------------------------------------------------------------------------------------------------------------------------------------------------------------------------------------------------------------------------------------------------------------------|
| Journal:                      | <i>BMJ Open</i>                                                                                                                                                                                                                                                                                                                                                                                                                                                                                                                                                                                                                                                                                                                                                                                                                                                                                                                                                                                                                                                                                                                                                                                                                                                                                                                                                                                                                                                                                                                                                                                                                                                                                                                                                                                                                                                                                                                                                                                                                                                                                                                                                                                                                                                          |
| Manuscript ID                 | bmjopen-2018-026362.R1                                                                                                                                                                                                                                                                                                                                                                                                                                                                                                                                                                                                                                                                                                                                                                                                                                                                                                                                                                                                                                                                                                                                                                                                                                                                                                                                                                                                                                                                                                                                                                                                                                                                                                                                                                                                                                                                                                                                                                                                                                                                                                                                                                                                                                                   |
| Article Type:                 | Protocol                                                                                                                                                                                                                                                                                                                                                                                                                                                                                                                                                                                                                                                                                                                                                                                                                                                                                                                                                                                                                                                                                                                                                                                                                                                                                                                                                                                                                                                                                                                                                                                                                                                                                                                                                                                                                                                                                                                                                                                                                                                                                                                                                                                                                                                                 |
| Date Submitted by the Author: | 31-Jan-2019                                                                                                                                                                                                                                                                                                                                                                                                                                                                                                                                                                                                                                                                                                                                                                                                                                                                                                                                                                                                                                                                                                                                                                                                                                                                                                                                                                                                                                                                                                                                                                                                                                                                                                                                                                                                                                                                                                                                                                                                                                                                                                                                                                                                                                                              |
| Complete List of Authors:     | <p>Zhang, Yan; Peking University First Hospital, Department of Cardiology<br/>         Yu, Bo; Key Laboratories of Education Ministry for Myocardial Ischemia Mechanism and Treatment, 2nd Affiliated Hospital of Harbin Medical University, Cardiology<br/>         Han, YL; The General Hospital of Shenyang Military Region, Department of Cardiology<br/>         Wang, Jianan; The Second Affiliated Hospital, Zhejiang University, Department of Cardiology<br/>         Yang, Lixia; Kunming General Hospital of Chengdu Military Region, Department of Cardiology<br/>         Wan, Zheng; The General Hospital of Tianjin Medical University, department of cardiology<br/>         Zhang, Zheng; The First Hospital of Lanzhou University, department of cardiology<br/>         Chen, Yu-guo; Qilu Hospital of Shandong University, Department of Emergency<br/>         Fu, Xianghua; The Second Hospital of Hebei Medical University, Department of Cardiology<br/>         Gao, Chuanyu; Henan Provincial People's Hospital, Zhengzhou University People's Hospital, Cardiology<br/>         Li, Bao; Shanxi Cardiovascular Hospital, department of cardiology<br/>         Chen, Ji-yan; Guangdong Cardiovascular Institute, Guangdong provincial Key Laboratory of Coronary Heart Disease Prevention, Guangdong General Hospital, Guangdong Academy of Medical Sciences, Cardiology<br/>         Wu, Ming; Hainan General Hospital, Department of cardiology<br/>         Ma, Yitong; The First Affiliated Hospital of Xinjiang Medical University, department of cardiology<br/>         Zhao, Xingsheng; Inner Mongolia People's Hospital, department of cardiology<br/>         Chen, Yundai; Chinese PLA General Hospital, department of cardiology<br/>         Yan, Hongbing; Fuwai Hospital, Chinese Academy of Medical Sciences, department of cardiology<br/>         Xiang, Dingcheng; Guangzhou General Hospital of Guangzhou Military Region, Department of Cardiology<br/>         Fang, Weiyi; Shanghai Chest Hospital, department of cardiology<br/>         Mehta, Sameer; Lumen Foundation<br/>         Naber, Christoph K; Stent Save a Life<br/>         Ge, Junbo; Zhongshan Hospital Fudan University, department of cardiology</p> |



1  
2  
3  
4  
5  
6  
7  
8  
9  
10  
11  
12  
13  
14  
15  
16  
17  
18  
19  
20  
21  
22  
23  
24  
25  
26  
27  
28  
29  
30  
31  
32  
33  
34  
35  
36  
37  
38  
39  
40  
41  
42  
43  
44  
45  
46  
47  
48  
49  
50  
51  
52  
53  
54  
55  
56  
57  
58  
59  
60

|                                    |                                                                                            |
|------------------------------------|--------------------------------------------------------------------------------------------|
|                                    | Huo, Yong ; Peking University First Hospital,                                              |
| <b>Primary Subject Heading</b> :   | Evidence based practice                                                                    |
| <b>Secondary Subject Heading</b> : | Medical management                                                                         |
| <b>Keywords</b> :                  | Accreditation, chest pain center, network, reperfusion, ST-elevation myocardial infarction |
|                                    |                                                                                            |

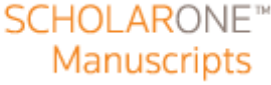

**Protocol of the China STEMI Care Project (CSCAP): a 10-year project to improve quality of care by building up a regional STEMI care network**

Yan Zhang<sup>1</sup>, Bo Yu<sup>2</sup>, Yaling Han<sup>3</sup>, Jianan Wang<sup>4</sup>, Lixia Yang<sup>5</sup>, Zheng Wan<sup>6</sup>, Zheng Zhang<sup>7</sup>, Yuguo Chen<sup>8</sup>, Xianghua Fu<sup>9</sup>, Chuanyu Gao<sup>10</sup>, Bao Li<sup>11</sup>, Jiyan Chen<sup>12</sup>, Ming Wu<sup>13</sup>, Yitong Ma<sup>14</sup>, Xingsheng Zhao<sup>15</sup>, Yundai Chen<sup>16</sup>, Hongbing Yan<sup>17</sup>, Dingcheng Xiang<sup>18</sup>, Weiyi Fang<sup>19</sup>, Sameer Mehta<sup>20</sup>, Christoph K. Naber<sup>21</sup>, Junbo Ge<sup>22</sup>, \*Yong Huo<sup>1</sup>, on behalf of China STEMI Care Project (CSCAP) Investigators

1. Department of Cardiology, Peking University First Hospital, Beijing, China
2. Department of Cardiology, The Second Affiliated Hospital of Harbin Medical University, Harbin, Heilongjiang Province, China
3. Department of Cardiology, The General Hospital of Shenyang Military Region, Shenyang, Liaoning Province, China
4. Department of Cardiology, The Second Affiliated Hospital Zhejiang University School of Medicine, Hangzhou, Zhejiang Province, China
5. Department of Cardiology, Kunming General Hospital of Chengdu Military Region, Kunming, Yunnan Department of Cardiology, China
6. Department of Cardiology, Tianjin Medical University General Hospital, Tianjin, China
7. Department of Cardiology, The First Hospital of Lanzhou University, Lanzhou, Gansu Province, China

- 1  
2  
3  
4 8. Department of Emergency, Qilu Hospital of Shandong University, Jinan,  
5  
6 Shandong Province, China
- 7  
8  
9 9. Department of Cardiology, The Second Hospital of Hebei Medical University,  
10  
11 Shijiazhuang, Hebei Province, China
- 12  
13  
14 10. Department of Cardiology, Henan Provincial People's Hospital, Zhengzhou,  
15  
16 Henan Province, China
- 17  
18  
19 11. Department of Cardiology, Shanxi Cardiovascular Hospital, Taiyuan, Shanxi  
20  
21 Province, China
- 22  
23  
24 12. Department of Cardiology, Guangdong General Hospital, Guangzhou,  
25  
26 Guangdong Province, China
- 27  
28  
29 13. Department of Cardiology, Hainan General Hospital, Haikou, Hainan Province,  
30  
31 China
- 32  
33  
34 14. Department of Cardiology, The First Affiliated Hospital of Xinjiang Medical  
35  
36 University, Urumchi, The Xinjiang Uygur Autonomous Region, China
- 37  
38  
39 15. Department of Cardiology, Inner Mongolia People's Hospital, Hohhot, The Inner  
40  
41 Mongolia Autonomous Region, China
- 42  
43  
44 16. Department of Cardiology, Chinese PLA General Hospital, Beijing, China
- 45  
46  
47 17. Department of Cardiology, Fuwai Hospital, Chinese Academy of Medical  
48  
49 Sciences, Beijing, China
- 50  
51  
52 18. Department of Cardiology, Guangzhou General Hospital of Guangzhou Military  
53  
54 Region, Guangzhou, Guangdong Province, China
- 55  
56  
57 19. Department of Cardiology, Shanghai Chest Hospital, Shanghai, China
- 58  
59  
60

1  
2  
3  
4 20. Lumen Foundation, Miami, USA  
5

6 21. Stent - Save A Life!, Paris, France  
7  
8

9 22. Department of Cardiology, Zhongshan Hospital Fudan University, Shanghai,  
10  
11 China  
12  
13

14  
15  
16  
17 **Running title:** Protocol of China STEMI Care Project  
18

19  
20  
21  
22 **Corresponding author:** Yong Huo, MD  
23

24 Department of Cardiology, Peking University First Hospital  
25

26  
27 8 Xishiku St, Xicheng District, Beijing 100034, China  
28

29  
30 Email: huoyong@263.net.cn  
31

32  
33 Phone: 86-10-83572283  
34

35  
36 Fax: 86-10-66137748  
37  
38  
39

40 **Date:**  
41

42  
43 This study was initiated in 2011 and will be completed in 2021. Phase 1 (CSCAP-1) is  
44  
45 conducted from 2011 to 2013, Phase 2 (CSCAP-2) is conducted from 2015 to 2018,  
46  
47 and Phase 3 (CSCAP-3) is conducted from 2018 to 2021, respectively.  
48  
49  
50  
51  
52  
53  
54  
55  
56  
57  
58  
59  
60

## Abstract

**Introduction:** Successful ST-segment elevation myocardial infarction (STEMI) management is time-sensitive and is based on prompt reperfusion mainly to reduce patient mortality. It has evolved from a single hospital care to an integrated regional network approach over the last decades. This prospective study, named the China STEMI Care Project (CSCAP), aims to show how implementation of different types of integrated regional STEMI care networks can improve the reperfusion treatment rate, shorten the total duration of myocardial ischemia, and lead to mortality reduction step by step.

**Methods and analysis:** The CSCAP is a prospective, multicenter registry involving 3 phases. A total of 18 provinces, 4 municipalities and 2 autonomous regions in China were included. Patients who met with the third universal definition of myocardial infarction and the Chinese STEMI diagnosis and treatment guidelines were enrolled. Phase 1 (CSCAP-1) focused on the in-hospital process optimization of primary percutaneous coronary intervention (PPCI) hospitals, phase 2 (CSCAP-2) focused on the PPCI hospital-based regional STEMI care network construction together with emergency medical services and adjacent non-PPCI hospitals, and phase 3 (CSCAP-3) focused on the whole-city STEMI care network construction by promoting chest pain center accreditation. Systematic data collection, key performance index assessment and subsequent improvement were implemented throughout the project to continuously improve the quality of STEMI care.

**Ethics and dissemination:** The study has been reviewed and approved by the Ethics

1  
2  
3  
4 Committee of Peking University First Hospital. Ranking reports of quality of care will  
5  
6 be generated available to all participant affiliations. Results will be disseminated via  
7  
8 peer-reviewed scientific journals and presentations at congresses.  
9  
10

11 **Trial registration number:** NCT03821012  
12  
13

### 14 15 16 **Strengths and limitations of this study** 17

- 18  
19  
20 ➤ CSCAP is the first project focused on establishing an integrated regional STEMI  
21  
22 care network in China through in-hospital process optimization, PPCI  
23  
24 hospital-based regional STEMI care network construction and whole-city STEMI  
25  
26 care network construction step by step, which will help to understand the  
27  
28 situations extensively and then improve accordingly.  
29  
30  
31  
32 ➤ Evaluation, feedback and improvement system will be established, aiming to  
33  
34 provide a tailored and continuous quality of care improvement plan based on the  
35  
36 conditions of different regions to further integrate the STEMI care network  
37  
38 nationwide.  
39  
40  
41  
42 ➤ Hospitals are not randomly selected in CSCAP which might be lead to the lack of  
43  
44 representatives to some degree. However, these hospitals are at a high level in  
45  
46 their region which is suitable to be core centers for regional network construction.  
47  
48 Their experiences could be valuable for hospitals in the same region but outside  
49  
50 this study.  
51  
52  
53  
54  
55  
56  
57  
58  
59  
60

## Introduction

The burden of cardiovascular diseases is increasing and posing a major public health issue worldwide. The number of new onset of myocardial infarction will be tremendous in China in the next 15 years with the increasing risk factors and aging population [1]. The Chinese cardiovascular report in 2017 showed an increase in both the percentage of hospitalization and mortality of acute myocardial infarction (AMI) over the years. The trends of fast growth nationwide as well as higher in rural areas in AMI mortality were observed since 2005 and 2013, respectively [2].

ST-elevation myocardial infarction (STEMI), mainly caused by a sudden obstruction of the coronary artery with thrombus, benefits from both increasing reperfusion rate and shortening of the duration from the symptom occurrence to the opening of the target vessel [3 4]. Although implementing an evidence-based medicine significantly improves the prognosis of patients with STEMI, the gap of the translational application is still large in real-world settings [5]. A majority of Chinese STEMI patients miss the optimal treatment timing due to restrictions from both patients and medical services [6 7]. Additionally, the ratio of significant deficiency in STEMI reperfusion treatment remained at the level of around 55% in the last decade. Hence, the in-hospital mortality has not changed significantly yet [7].

Successful treatment of STEMI is a systemic issue, and the solution is neither a novel thrombolytic drug nor an intervention device. It can be brought about by comprehensive factors, including patient health awareness, physician level, physician–patient relationship, medical reimbursement system, prehospital emergency

1  
2  
3  
4 system, in-hospital treatment, connection mechanism between prehospital and  
5  
6 in-hospital care, and posthospital management. Experiences from both the American  
7  
8 Lifeline program and the European Stent – Save a Life can be used for reference. The  
9  
10 quality of medical service can be significantly improved by establishing a regional  
11  
12 STEMI care network through close collaboration with different levels of hospitals and  
13  
14 the emergency medical system (EMS) [8 9].  
15  
16  
17  
18

19  
20 Although large-scale studies have been conducted in China, such as Clinical  
21  
22 Pathways for Acute Coronary Syndromes in China (CPACS) focusing on the ACS  
23  
24 clinical pathway, Cardiovascular Disease in China (CCC) focusing on the in-hospital  
25  
26 treatment of acute coronary syndrome (ACS), China Acute Myocardial Infarction  
27  
28 (CAMI) Registry focusing on the management of both STEMI and non-STEMI, and  
29  
30 China Patient-centered Evaluative Assessment of Cardiac Events Retrospective Study  
31  
32 of Acute Myocardial Infarction (China PEACE-Retrospective AMI Study), none of  
33  
34 them focused on establishing a regional STEMI care network [7 10-12]. Serial  
35  
36 documents issued by the National Health Commission of China provide favorable  
37  
38 government support and further emphasize the importance of administrative  
39  
40 departments of health care at all levels in strengthening the construction of regional  
41  
42 emergency medical treatment system [13-15].  
43  
44  
45  
46  
47  
48  
49

50  
51 China has gradually increased the input of medical expense in the last few decades.  
52  
53 However, there are several types of medical insurances with different reimbursement  
54  
55 rate in China. The impacts of medical insurance policy coverage as well as  
56  
57 geographical and humanistic factors on STEMI management need to be discussed.  
58  
59  
60



## Objectives

The 10-year project, named as China STEMI Care Project (CSCAP), aims to show how implementation of different types of integrated regional STEMI care networks can improve the reperfusion treatment rate, shorten the total duration of myocardial ischemia, and lead to mortality reduction step by step. It will also provide useful information when building up a STEMI care network in other similar regions. In details, CSCAP focuses on improving the awareness of health and emergency treatment for STEMI patients, increasing the ratio of reperfusion treatment, shortening the overall duration of myocardial ischemia, and implementing standard secondary prevention to improve the long-term prognosis by establishing and optimizing medical care evaluation, feedback and improvement system with data support.

## Methods and analysis

### Study design

CSCAP is a prospective multicenter registry containing 3 phases. Phase 1 of CSCAP (CSCAP-1) focused on the in-hospital process optimization of primary percutaneous coronary intervention (PPCI) hospitals. Phase 2 of CSCAP (CSCAP-2) focused on the PPCI hospital-based regional STEMI care network construction with their adjacent non-PPCI hospitals and EMS. Phase 3 of CSCAP (CSCAP-3) focused on the whole-city STEMI care network construction by promoting chest pain center (CPC) accreditation (Fig. 1). Systematic data collection, assessment of quality of care and subsequent improvement were implemented throughout this study to continuously

1  
2  
3  
4 improve the quality of care.  
5

## 6 **Organizational framework**

7  
8  
9 CSCAP was established by the Chinese Medical Doctor Association and supported by  
10  
11 the National Health Commission of China in 2011. After collaborating with the  
12  
13 European Stent – Save a Life in CSCAP-3, China became its member country in 2017.  
14  
15 The project office, executive committee and steering committee were set up for the  
16  
17 purpose of management, implementation and academic support. Data management  
18  
19 and statistical analyses were conducted by the School of Public Health of Peking  
20  
21 University.  
22  
23  
24  
25

## 26 **Site selection**

27  
28  
29 CSCAP included 18 provinces (Anhui, Fujian, Gansu, Guangdong, Guangxi, Hainan,  
30  
31 Hebei, Heilongjiang, Henan, Hubei, Jiangsu, Liaoning, Shandong, Shanxi, Shaanxi,  
32  
33 Sichuan, Yunnan, and Zhejiang), 4 municipalities (Beijing, Chongqing, Shanghai, and  
34  
35 Tianjin) and 2 autonomous regions (Inner Mongolia and Xinjiang) in China when  
36  
37 considering incidence of STEMI, logistic as well as economic issues (Fig. 2).  
38  
39  
40  
41

42  
43 A total of 53 tertiary hospitals qualified for PPCI in 14 provinces, municipalities or  
44  
45 autonomous regions of China were enrolled in CSCAP-1. The qualification of these  
46  
47 selected hospitals is based on the numbers of PCI cases and cardiovascular  
48  
49 interventionists extracted from the national PCI registry database. Moreover, all of  
50  
51 them are able to provide 24/7 PPCI service. These hospitals were selected because  
52  
53 they were at the top level in their city and potentially a hub for regional network  
54  
55 construction in CSCAP-2. A total of 244 PCI hospitals with adjunct non-PCI hospitals  
56  
57  
58  
59  
60

1  
2  
3  
4 from 24 provinces, municipalities and autonomous regions were selected to build up  
5  
6 the regional STEMI care network in CSCAP-2. A total of 7 cities (Harbin, Hangzhou,  
7  
8 Nanning, Qingdao, Shenzhen, Suzhou, and Taiyuan) from 7 provinces with different  
9  
10 EMS types were selected to build up the whole-city STEMI care network in  
11  
12 CSCAP-3 (Fig. 2).  
13  
14  
15

### 16 17 **Patient enrollment**

18  
19 Patients who met with the third universal definition of myocardial infarction and the  
20  
21 Chinese STEMI diagnosis and treatment guidelines were enrolled [16 17]. STEMI  
22  
23 patients with late admission to hospitals were also considered for the purpose of  
24  
25 exploring optimal methods to shorten total ischemic time containing both patient  
26  
27 delay and system delay issues. All patients received routine clinical assessments and  
28  
29 treatments without any experimental intervention. The updated guideline-directed  
30  
31 management such as reperfusion, auxiliary device implementation, elective  
32  
33 revascularization, medications and therapeutic lifestyle change will be implemented  
34  
35 during the whole study period.  
36  
37  
38  
39  
40  
41  
42

43 In CSCAP-1, a total of 4,191 hospitalized patients, with symptom onset within 12 h  
44  
45 regardless of whether receiving reperfusion or symptom onset within 12–24 h of  
46  
47 needing PPCI, were enrolled consecutively in 2012. In CSCAP-2, a total of 20,799  
48  
49 patients with STEMI occurrence within 30 days regardless of reperfusion were  
50  
51 enrolled consecutively from PPCI hospitals 3 times at a 6-month interval from 2015  
52  
53 to 2017. In CSCAP-3, a total of 30 hospitalized STEMI patients with symptom onset  
54  
55 within 30 days will be enrolled consecutively from both PCI and non-PCI hospitals in  
56  
57  
58  
59  
60

1  
2  
3  
4 the whole-city network every 3 months. Those patients who survived after hospital  
5  
6 discharge will be followed up for 1 year.  
7

### 8 9 **Regional network construction**

10  
11 An integrated regional network contains PCI hospitals, non-PCI hospitals and EMS.  
12  
13 There are 3 major types of EMS exist in China: (1) independent-type EMS, which has  
14  
15 its own ambulances; (2) command-type EMS, which does not have its own  
16  
17 ambulances and uses local hospital ambulances; and (3) affiliate-type EMS, which is  
18  
19 based in hospitals and uses its ambulances. On the basis of these comprehensive  
20  
21 situations, patients may not be transported to optimal hospitals to receive effective  
22  
23 treatment in the shortest period because of incomplete communication [18]. Thus,  
24  
25 prehospital information transmission should be considered accordingly for hospital  
26  
27 alert and rapid and accurate transfer.  
28  
29  
30  
31  
32  
33

34  
35 Although PPCI is the most effective treatment for STEMI, it is difficult to be  
36  
37 implemented in most of the primary hospitals, as they are limited by medical  
38  
39 condition, geographic location and techniques. Early thrombolysis and/or transfer PCI  
40  
41 strategy are the priority in most of these hospitals. Therefore, rapid identification of  
42  
43 STEMI and referral to a hospital with PPCI ability are extremely important  
44  
45 components in establishing a regional STEMI care network in China.  
46  
47  
48  
49

50  
51 Optimizing the in-hospital green channel can significantly shorten the  
52  
53 door-to-balloon (D2B) time and door-to-needle (D2N) time while establishing a CPC  
54  
55 to integrate multiple resources is one of the most important methods [19 20].  
56  
57 Traditional CPC focuses on the optimization and integration of the in-hospital sources  
58  
59  
60

1  
2  
3  
4 aimed to shorten the process. The medical system and patient factors together  
5  
6 determine the delay in STEMI emergency treatment [21]. The concept of a modern  
7  
8 CPC expands to establish an effective regional network aiming to shorten the total  
9  
10 ischemia duration, thereby maximizing the advantage of reperfusion therapy. The  
11  
12 CPC independent accreditation in China was initiated in 2013 and 2 types  
13  
14 accreditation standards were developed according to PPCI ability [22 23].  
15  
16  
17  
18

### 19 **Procedures**

20  
21  
22 The treatment process of the patients suffered STEMI was based on the STEMI  
23  
24 protocol in the Announcement of Improving Medical Emergency Treatment  
25  
26 Performance of Acute Cardiovascular and Cerebrovascular Diseases issued by the  
27  
28 National Health Commission of China in 2015 [15]. Briefly, this flow chart included  
29  
30 1 center (EMS), 2 types of hospitals (PCI and non-PCI), 3 types of transfer methods  
31  
32 [EMS transfer to hospital, bypass emergency department (ED) and inter-hospital  
33  
34 transfer], and 11 clinical pathways. Different clinical pathways were selected to  
35  
36 execute the optimal emergency treatment based on the visiting time, approaching  
37  
38 method and hospital ability (Fig. 3). In addition, the procedures should be launched  
39  
40 without results of myocardial biomarkers according to typical ischemic symptoms and  
41  
42 electrocardiogram (ECG).  
43  
44  
45  
46  
47  
48  
49

### 50 **Data collection and management**

51  
52  
53 Data of all treatment process were collected, including patient general information,  
54  
55 prehospital treatment, in-hospital management and follow-up management (Table 1).  
56  
57  
58 Considering the real situation in ED, many time points could not be recorded  
59  
60

1  
2  
3  
4 manually on time which might lead to missing and inaccurate data. Mobile device app  
5  
6 could record these time variables through a simple click and complete the prehospital  
7  
8 ECG transmission. The technique of data auto-capture becomes  
9  
10 more and more popular at present and should resolve this issue. All of these methods  
11  
12 are considered gradually in this study.  
13  
14  
15

16  
17 Data were inputted into a self-built electronic database together with two existing  
18  
19 databases of both CPC accreditation and national PCI registry by trained clinical  
20  
21 research coordinators and clinicians in each hospital. The quality of the data was  
22  
23 monitored and suspicious contents with missing, outlier and logical errors were  
24  
25 reviewed mainly. When all problems are resolved, the database is then locked for  
26  
27 statistical analysis.  
28  
29  
30  
31

32  
33 The describing method was used in CSCAP to mainly rank data quality and  
34  
35 medical quality. Continuous variables were described as mean (standard deviation) or  
36  
37 median (interquartile range), while categorical variables were described as a  
38  
39 percentage. The multivariate regression model was used to evaluate the factors related  
40  
41 to the assessment of medical quality. The Cox model was used to analyze the  
42  
43 association between exposures and medical outcomes. A *P* value < 0.05 was defined  
44  
45 as a significant difference. All analyses were performed using R  
46  
47 (<http://www.R-project.org>).  
48  
49  
50  
51

### 52 53 **Key performance index**

54  
55 The National Cardiovascular Data Registry (NCDR), established since 1997, has  
56  
57 become the basis for project implementation and quality evaluation as well as  
58  
59  
60

1  
2  
3  
4 research center medical quality improvement in the United States. It has a positive  
5  
6 impact on clinical practice, medical payment, clinical research and government  
7  
8 decision-making [24 25]. The present study referred to the NCDR model to optimize  
9  
10 the STEMI quality of care and established an evaluation, feedback and improvement  
11  
12 system for primary key performance indexes (KPIs). For KPI selection, PPCI  
13  
14 hospitals focused on the improvement in the PPCI capacity and efficiency, non-PPCI  
15  
16 hospitals focused on the improvement in rapid diagnosis, thrombolysis and referral  
17  
18 capacity to PPCI hospitals, and EMS focused on the improvement in information  
19  
20 transmission to alert hospitals early for the purpose of rapid and accurate transfer.  
21  
22  
23  
24  
25

26  
27 A total of 13 primary KPIs were selected for medical quality evaluation based on  
28  
29 different roles of EMS and hospitals in STEMI management (Table 2). These KPIs  
30  
31 are different in each phase but have internal logic. Except reperfusion rate, method  
32  
33 and cardiovascular outcomes, different treatment delay indexes are selected in  
34  
35 different phases which will shift to others step by step according to the progress of  
36  
37 network construction. D2N and D2B time, defined as from in-hospital FMC to target  
38  
39 vessel open, were used to evaluate in-hospital delay in CSCAP-1. First medical  
40  
41 contact-to-balloon time (FMC2B) and first medical contact-to-needle time (FMC2N)  
42  
43 time, defined as FMC by emergency system or hospital to target vessel open, were  
44  
45 used to evaluate the whole medical system delay in CSCAP-2. Total ischemic time,  
46  
47 defined as from symptom onset to target vessel open, is used in CSCAP-3 to add the  
48  
49 information of patient delay.  
50  
51  
52  
53  
54  
55  
56

57  
58 The circular enrollment–evaluation–feedback–improvement method will be  
59  
60

1  
2  
3  
4 implemented in both CSCAP-2 and CSCAP-3. The quality feedback report contains  
5  
6 each KPI of the affiliation and its ranking within its regional network and among all  
7  
8 affiliations. Comparison of KPIs with itself and those of others was analyzed for  
9  
10 tailed improvements.  
11  
12

### 13 14 15 **Patient and public involvement**

16  
17  
18 The development of the research questions and outcome measures was informed by  
19  
20 the current situations of lacking of the integrated regional STEMI care network in  
21  
22 China. Patients were not offered the opportunity to participate in the study design.  
23  
24 They will obtain the information related to the study via public media as well as  
25  
26 academic publications.  
27  
28  
29  
30  
31  
32

### 33 34 **Ethics and dissemination**

35  
36 The study was conducted in accordance with Declaration of Helsinki. The study  
37  
38 protocol was approved by the Ethics Committee of Peking University First Hospital.  
39  
40 Ranking reports of quality of care will be made available to all participant affiliations.  
41  
42 Results will be disseminated at international conferences and published in  
43  
44 peer-reviewed scientific journals or public media.  
45  
46  
47  
48  
49

### 50 51 **Discussion**

52  
53 The integration and optimization of an integrated regional network with government  
54  
55 support are urgent issues of STEMI care especially in China. CSCAP is the first  
56  
57 prospective registry study focused on regional network construction and will help  
58  
59  
60



1  
2  
3  
4 extensively understand the basic situations and the differences with other countries,  
5  
6 which leading to optimized clinical practice and problem-guided improvement. It will  
7  
8  
9 provide important information for the network construction shifting from the PPCI  
10  
11 hospital-centered regional network to the whole-city network step by step so as to  
12  
13  
14 create an optimal integrate STEMI care system in China.  
15  
16  
17  
18

19 **Contributions** Yan Zhang coordinated the study, assisted with data collection,  
20  
21 performed data analysis, and drafted the manuscript. Bo Yu, Yaling Han, Jianan  
22  
23 Wang, Lixia Yang, Zheng Wan, Zheng Zhang, Yuguo Chen, Xianghua Fu, Chuanyu  
24  
25 Gao, Bao Li, Jiyan Chen, Ming Wu, Yitong Ma, Xingsheng Zhao, Yundai Chen,  
26  
27 Hongbing Yan, Dingcheng Xiang, Weiyi Fang, and Junbo Ge carried out the data  
28  
29 collection and helped draft the manuscript. Sameer Mehta and Christoph K Naber  
30  
31 participated in the design and helped draft the manuscript. Yong Huo, principal  
32  
33 investigator of the project, conceived and designed the project, helped collect data and  
34  
35 draft the manuscript. All authors reviewed the results and approved the final version  
36  
37  
38  
39  
40  
41  
42  
43  
44  
45  
46  
47  
48 of the manuscript.  
49

## 50 **Acknowledgments**

51 The authors thank the study team members and patient advisers of all  
52  
53 collaborative hospitals and emergency medical services. They are also grateful to the  
54  
55 organizational coordination of Chinese Medical Doctor Association and China  
56  
57 Cardiovascular Association. They acknowledge the supports provided by the National  
58  
59  
60

1  
2  
3  
4 Health Commission and local governments in China.  
5  
6  
7  
8

9 **Funding** CSCAP was funded by Sanofi-Aventis, Abbott, and AstraZeneca.  
10

11 **Competing interest** None declared.  
12

13 **Patient consent for publication** Not required.  
14

15 **Ethics approval** This study was reviewed and approved by the Ethics Committees  
16  
17 at Peking University First Hospital.  
18  
19  
20  
21  
22  
23  
24  
25  
26  
27  
28  
29  
30  
31  
32  
33  
34  
35  
36  
37  
38  
39  
40  
41  
42  
43  
44  
45  
46  
47  
48  
49  
50  
51  
52  
53  
54  
55  
56  
57  
58  
59  
60

## References

1. Stevens W, Peneva D, Li JZ, et al. Estimating the future burden of cardiovascular disease and the value of lipid and blood pressure control therapies in China. *BMC health services research* 2016;**16**:175.
2. *Report on cardiovascular disease in China*: Encyclopedia of China Publishing house, 2017.
3. O'Gara PT, Kushner FG, Ascheim DD, et al. 2013 ACCF/AHA guideline for the management of ST-elevation myocardial infarction: a report of the American College of Cardiology Foundation/American Heart Association Task Force on Practice Guidelines. *Circulation* 2013;**127**:e362-425.
4. Task Force on the management of ST-segment elevation acute myocardial infarction of the European Society of Cardiology (ESC), Steg PG, James SK, et al. ESC Guidelines for the management of acute myocardial infarction in patients presenting with ST-segment elevation. *European heart journal* 2012;**33**:2569-619.
5. Eagle KA, Nallamothu BK, Mehta RH, et al. Trends in acute reperfusion therapy for ST-segment elevation myocardial infarction from 1999 to 2006: we are getting better but we have got a long way to go. *European heart journal* 2008;**29**:609-17.
6. Song L, Hu DY, Yan HB, et al. Influence of ambulance use on early reperfusion therapies for acute myocardial infarction. *Chinese medical journal* 2008;**121**:771-5.

- 1  
2  
3  
4 7. Li J, Li X, Wang Q, et al. ST-segment elevation myocardial infarction in China  
5  
6 from 2001 to 2011 (the China PEACE-Retrospective Acute Myocardial  
7  
8 Infarction Study): a retrospective analysis of hospital data. *Lancet*  
9  
10 2015;**385**:441-51.  
11  
12
- 13  
14 8. Jollis JG, Granger CB, Henry TD, et al. Systems of care for ST-segment-elevation  
15  
16 myocardial infarction: a report From the American Heart Association's  
17  
18 Mission: Lifeline. *Circulation. Cardiovascular quality and outcomes*  
19  
20 2012;**5**:423-8.  
21  
22
- 23  
24 9. Kristensen SD, Fajadet J, Di Mario C, et al. Implementation of primary angioplasty  
25  
26 in Europe: stent for life initiative progress report. *EuroIntervention : journal of*  
27  
28 *EuroPCR in collaboration with the Working Group on Interventional*  
29  
30 *Cardiology of the European Society of Cardiology* 2012;**8**:35-42.  
31  
32
- 33  
34 10. Gao R, Patel A, Gao W, et al. Prospective observational study of acute coronary  
35  
36 syndromes in China: practice patterns and outcomes. *Heart* 2008;**94**:554-60.  
37  
38
- 39  
40 11. Hao Y, Liu J, Liu J, et al. Rationale and design of the Improving Care for  
41  
42 Cardiovascular Disease in China (CCC) project: A national effort to prompt  
43  
44 quality enhancement for acute coronary syndrome. *American heart journal*  
45  
46 2016;**179**:107-15.  
47  
48
- 49  
50 12. Xu H, Li W, Yang J, et al. The China Acute Myocardial Infarction (CAMI)  
51  
52 Registry: A national long-term registry-research-education integrated platform  
53  
54 for exploring acute myocardial infarction in China. *American heart journal*  
55  
56 2016;**175**:193-201.e3.  
57  
58  
59  
60

- 1  
2  
3  
4 13. Pre-hospital medical emergency management measures. *Chinese Village Medicine*  
5  
6 2014;85-86. (In Chinese)  
7  
8  
9 14. National Health Commission of China. Guiding Principles for Construction and  
10  
11 Management of Chest Pain Center (Trial). 2017. (In Chinese)  
12  
13  
14 15. National Health Commission of China. The Announcement of Improving Medical  
15  
16 Emergency Treatment Performance of Acute Cardiovascular and  
17  
18 Cerebrovascular Diseases. 2015. (In Chinese)  
19  
20  
21  
22 16. Thygesen K, Alpert JS, Jaffe AS, et al. Third universal definition of myocardial  
23  
24 infarction. *Circulation* 2012;**126**:2020-35.  
25  
26  
27 17. Chinese Society of Cardiology, Editorial board of Chinese Journal of Cardiology.  
28  
29 Guidelines for the diagnosis and treatment of acute ST segment elevation  
30  
31 myocardial infarction. *Chinese Journal of Cardiology* 2015;**43**:380-93. (In  
32  
33 Chinese)  
34  
35  
36  
37 18. Ranasinghe I, Rong Y, Du X, et al. System barriers to the evidence-based care of  
38  
39 acute coronary syndrome patients in China: qualitative analysis. *Circulation.*  
40  
41 *Cardiovascular quality and outcomes* 2014;**7**:209-16.  
42  
43  
44  
45 19. Bradley EH, Herrin J, Wang Y, et al. Strategies for reducing the door-to-balloon  
46  
47 time in acute myocardial infarction. *The New England journal of medicine*  
48  
49 2006;**355**:2308-20.  
50  
51  
52  
53 20. Graff LG, Dallara J, Ross MA, et al. Impact on the care of the emergency  
54  
55 department chest pain patient from the chest pain evaluation registry  
56  
57 (CHEPER) study. *The American journal of cardiology* 1997;**80**:563-8.  
58  
59  
60

- 1  
2  
3  
4 21. Windecker S, Bax JJ, Myat A, et al. Future treatment strategies in ST-segment  
5  
6 elevation myocardial infarction. *Lancet* 2013;**382**:644-57.  
7  
8  
9 22. China Chest Pain Center Accreditation Work Committee. Standard for Chinese  
10  
11 Chest Pain Center accreditation. *Chinese Journal of Interventional Cardiology*  
12  
13 2016;**24**:121-30. (In Chinese)  
14  
15  
16 23. China Chest Pain Center Accreditation Work Committee. Standard for Chinese  
17  
18 Primary Chest Pain Center accreditation. *Chinese Journal of Interventional*  
19  
20 *Cardiology* 2016;**24**:131-33. (In Chinese)  
21  
22  
23 24. Diercks DB, Kontos MC, Chen AY, et al. Utilization and impact of pre-hospital  
24  
25 electrocardiograms for patients with acute ST-segment elevation myocardial  
26  
27 infarction: data from the NCDR (National Cardiovascular Data Registry)  
28  
29 ACTION (Acute Coronary Treatment and Intervention Outcomes Network)  
30  
31 Registry. *Journal of the American College of Cardiology* 2009;**53**:161-6.  
32  
33  
34 25. Krim SR, Vivo RP, Krim NR, et al. Regional differences in clinical profile,  
35  
36 quality of care, and outcomes among Hispanic patients hospitalized with acute  
37  
38 myocardial infarction in the Get with Guidelines-Coronary Artery Disease  
39  
40 (GWTG-CAD) registry. *American heart journal* 2011;**162**:988-95. e4.  
41  
42  
43  
44  
45  
46  
47  
48  
49  
50  
51  
52  
53  
54  
55  
56  
57  
58  
59  
60

**Table 1. CSCAP data elements**

| Category                     | Example elements                                                                                                                                                                                                                                                                                                                                                                                     |
|------------------------------|------------------------------------------------------------------------------------------------------------------------------------------------------------------------------------------------------------------------------------------------------------------------------------------------------------------------------------------------------------------------------------------------------|
| Patient baseline information | Demographics (age, sex, ethnicity, occupation, marriage status, and medical insurance type)<br><br>Risk factors (smoking status, BMI, hypertension, diabetes, dyslipidemia, peripheral artery disease, MI history, stroke history, and prior revascularization)<br><br>Clinical presentation (blood pressure, heart rate, and cardiac function classification)                                       |
| Prehospital information      | Patient (symptoms, symptom onset time, and hospital approaching method)<br><br>EMS (response time, transfer process, first ECG time, ECG transmission ratio, and bypass ED ratio)<br><br>Non-PCI hospital (hospital approaching method, first medical contact time, admission time, first ECG time, diagnosis time, consent time, reperfusion and other treatment, DI-DO time, and transfer process) |
| PCI hospital information     | Reperfusion (methods, indication and contraindication, and nonreperfusion reasons)<br><br>Treatment delay (hospital approaching method, first medical contact time, bypass ED ratio, admission time, first ECG time, catheter lab ready time, consent time, D2B, D2N, FMC2B,                                                                                                                         |

1  
2  
3  
4 FMC2N, total ischemic time, and reasons of delay)  
5  
6  
7 PCI procedures (operative route, coronary angiography  
8  
9 results, aspiration, culprit vessels, stent, and elective PCI)  
10  
11  
12 Thrombolytic procedures (thrombolytic agent, dose, and  
13  
14 outcome)  
15  
16  
17 Medications (loading dose DAPT and statin, antiplatelets,  
18  
19  $\beta$ -blockers, statin, ACEI/ARB, GP IIb/IIIa inhibitor, and  
20  
21 anticoagulant with dose and contraindication information)  
22  
23  
24 Laboratory results (troponin, CK-MB, creatinine, hemoglobin,  
25  
26 HbA1c, fasting glucose, BNP or NT-proBNP, lipid profiles,  
27  
28 ECG, and UCG)  
29  
30  
31 Discharge (diagnosis, in-hospital duration, expense, and  
32  
33 medications)  
34  
35  
36 Outcomes (death, non-fatal reinfarction, nonfatal stroke,  
37  
38 revascularization, mechanical complication, and bleeding)  
39  
40  
41  
42  
43 Follow-up and management Presentation status (symptom, cardiac function classification,  
44  
45 blood pressure, heart rate, and follow-up on-time ratio)  
46  
47  
48 Laboratory results (lipid profiles, glucose traits, HbA1c,  
49  
50 creatinine, hemoglobin, BNP or NT-proBNP, ECG, and  
51  
52 UCG)  
53  
54  
55 Medications (antiplatelets,  $\beta$ -blockers, statin, and ACEI/ARB)  
56  
57  
58 Risk factor control rate (Blood pressure, lipid, glucose, and  
59  
60



1  
2  
3  
4 smoking cessation)

5  
6 Outcomes (death, nonfatal reinfarction, stroke,  
7  
8 revascularization, rehospitalization due to unstable angina  
9  
10 pectoris, heart failure or other cardiovascular reasons, and  
11  
12 bleeding)  
13  
14  
15

---

16  
17 ACEI, Angiotensin-converting enzyme inhibitor; ARB, angiotensin receptor blocker;  
18  
19 BMI, body mass index; BNP, brain natriuretic peptide; CK-MB, creatine kinase MB  
20  
21 isoenzyme; DAPT, dual antiplatelet therapy; D2B, door to balloon; D2N, door to  
22  
23 needle; DI-DO, door in-door out; ECG, electrocardiograph; ED, emergency  
24  
25 department; EMS, emergency medical service; FMC2B, first medical contact to  
26  
27 balloon; FMC2N, first medical contact to needle injection; GP IIb/IIIa, glycoprotein  
28  
29 IIb/IIIa; HbA1c, glycosylated hemoglobin A1c; MI, myocardial infarction;  
30  
31 NT-ProBNP, N-terminal pro-brain natriuretic peptide; PCI, percutaneous coronary  
32  
33 intervention; UCG, ultrasound cardiogram.  
34  
35  
36  
37  
38  
39  
40  
41  
42  
43  
44  
45  
46  
47  
48  
49  
50  
51  
52  
53  
54  
55  
56  
57  
58  
59  
60

**Table 2. Primary performance measures for evaluating medical care quality**

---

**Primary performance measures**

---

**Prehospital care**

Symptom onset to arrival in hospital (min)

Hospital admission ratio via ambulance (%)

Prehospital ECG transmission ratio (%)

Bypass ED ratio in patients with symptom onset within 12 h (%)

**Reperfusion**

Overall reperfusion ratio (%)

Thrombolysis ratio in patients with symptom onset within 12 h (%)

Primary PCI ratio in patients with symptom onset within 12 h (%)

D2B in patients with symptom onset within 12 h (min)

D2N in patients with symptom onset within 12 h (min)

**Discharge**Usage of both DAPT, statin,  $\beta$  blocker, and ACEI/ARB in patients without contraindication (%)**Outcomes**

In-hospital mortality (%)

**Follow-up and management**

1-Year on-time follow-up ratio (%)

1-Year MACE (%), including mortality, non-fatal myocardial infarction, non-fatal stroke, and hospitalization due to heart failure or acute coronary syndrome

---

ACEI, Angiotensin-converting enzyme inhibitor; ARB, angiotensin receptor blocker;

1  
2  
3  
4 DAPT, dual antiplatelet therapy; D2B, door to balloon; D2N, door to needle; ECG,  
5  
6 electrocardiogram; ED, emergency department; PCI, percutaneous coronary  
7  
8  
9 intervention; MACE, major adverse cardiovascular event.  
10  
11  
12  
13  
14  
15  
16  
17  
18  
19  
20  
21  
22  
23  
24  
25  
26  
27  
28  
29  
30  
31  
32  
33  
34  
35  
36  
37  
38  
39  
40  
41  
42  
43  
44  
45  
46  
47  
48  
49  
50  
51  
52  
53  
54  
55  
56  
57  
58  
59  
60

For peer review only

1  
2  
3  
4 **Figure legends**  
5

6 Figure 1. CSCAP whole-city STEMI care network construction.  
7

8  
9 Figure 2. Geographic distribution of CSCAP.  
10

11  
12 Figure 3. CSCAP STEMI emergency care flow chart.  
13  
14  
15  
16  
17  
18  
19  
20  
21  
22  
23  
24  
25  
26  
27  
28  
29  
30  
31  
32  
33  
34  
35  
36  
37  
38  
39  
40  
41  
42  
43  
44  
45  
46  
47  
48  
49  
50  
51  
52  
53  
54  
55  
56  
57  
58  
59  
60

For peer review only

1  
2  
3  
4  
5  
6  
7  
8  
9  
10  
11  
12  
13  
14  
15  
16  
17  
18  
19  
20  
21  
22  
23  
24  
25  
26  
27  
28  
29  
30  
31  
32  
33  
34  
35  
36  
37  
38  
39  
40  
41  
42  
43  
44  
45  
46  
47  
48  
49  
50  
51  
52  
53  
54  
55  
56  
57  
58  
59  
60

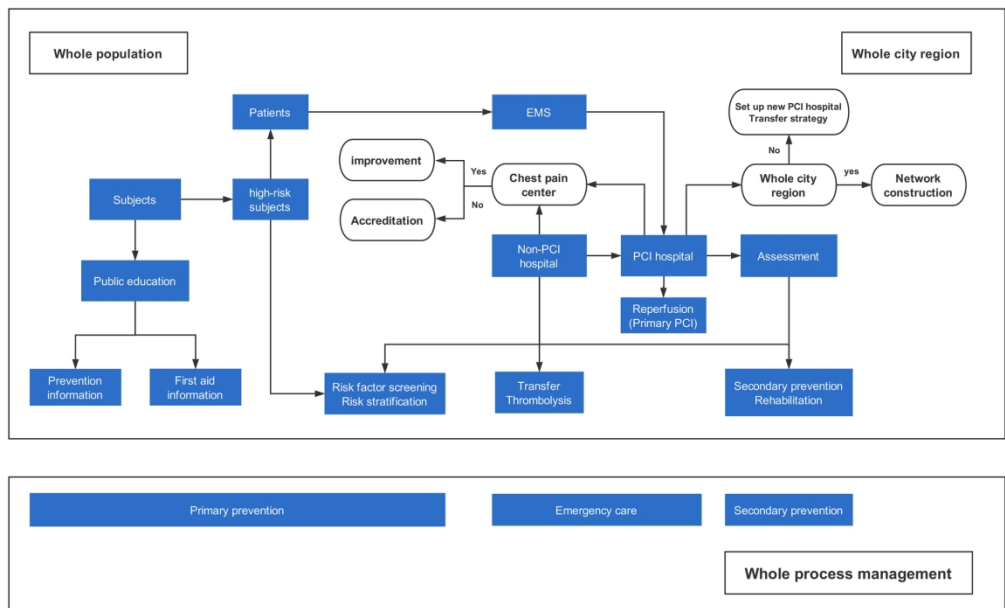

170x102mm (300 x 300 DPI)

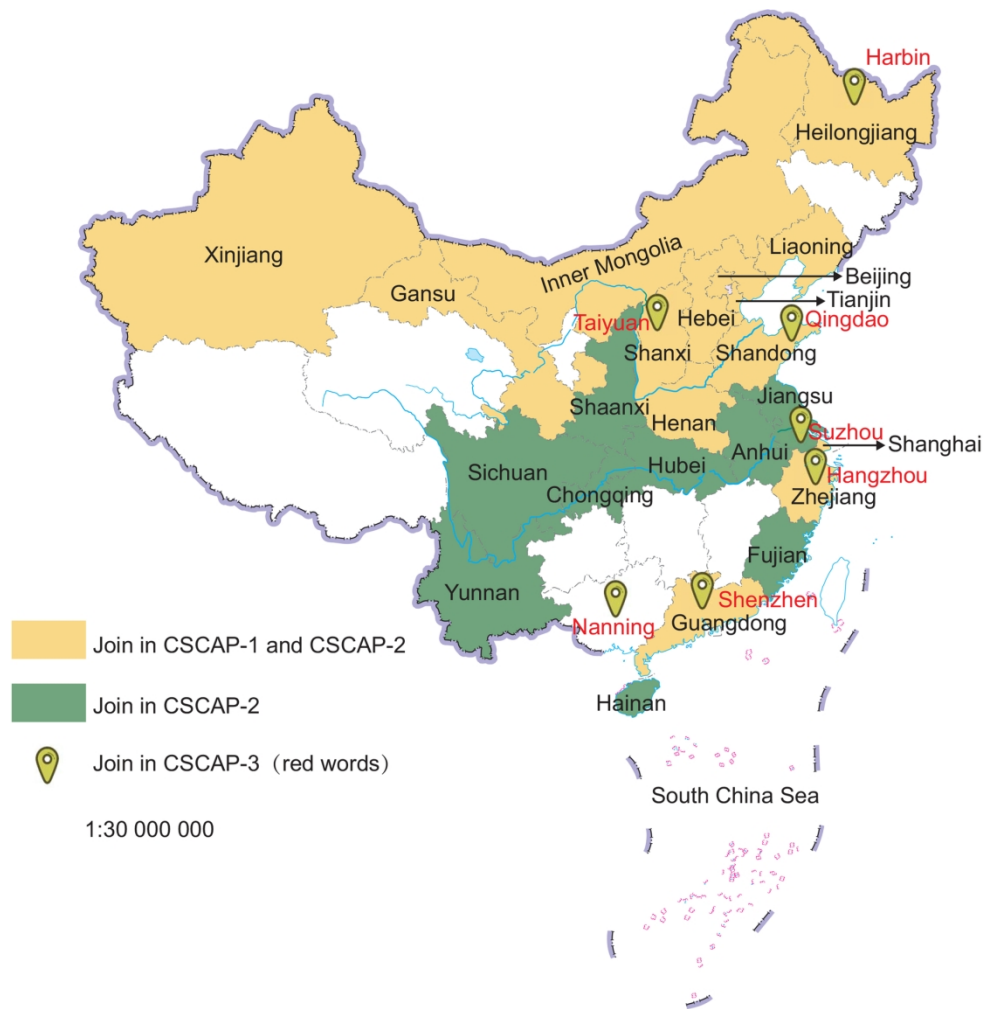

170x170mm (300 x 300 DPI)

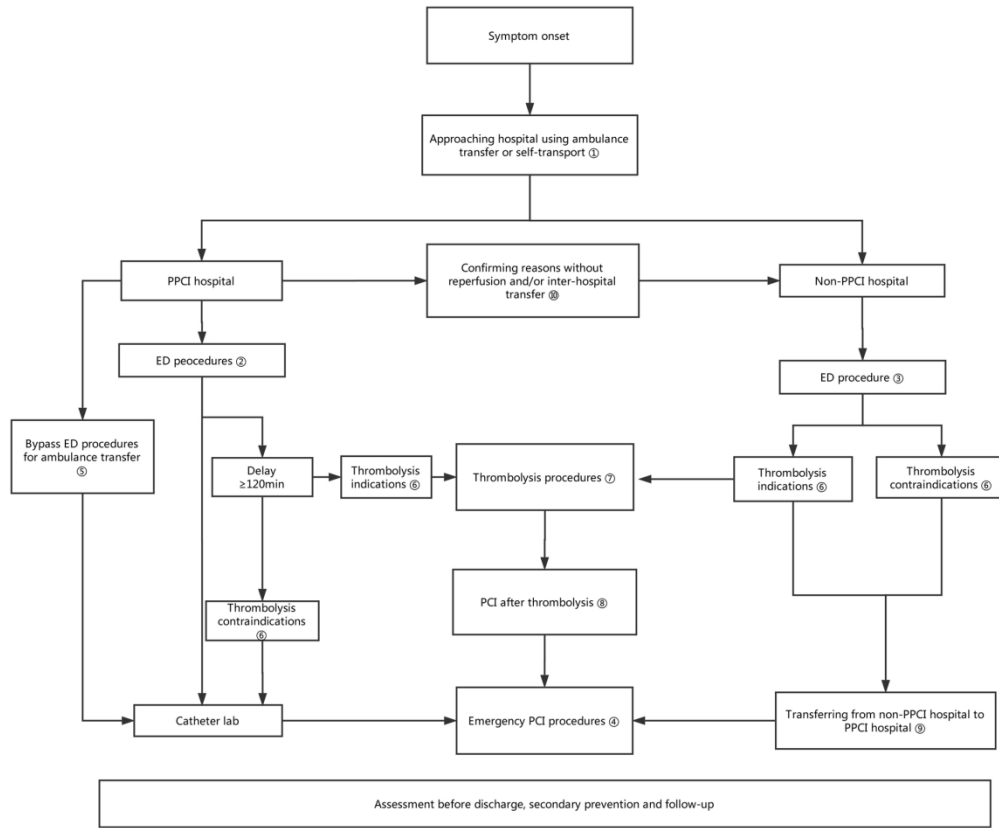

PCI, percutaneous intervention

170x148mm (300 x 300 DPI)

# BMJ Open

## Protocol of the China ST-segment elevation myocardial infarction (STEMI) Care Project (CSCAP): a 10-year project to improve quality of care by building up a regional STEMI care network

|                               |                                                                                                                                                                                                                                                                                                                                                                                                                                                                                                                                                                                                                                                                                                                                                                                                                                                                                                                                                                                                                                                                                                                                                                                                                                                                                                                                                                                                                                                                                                                                                                                                                                                                                                                                                                                                                                                                                                                                                                                                                                                                                                                                                                                                                                                               |
|-------------------------------|---------------------------------------------------------------------------------------------------------------------------------------------------------------------------------------------------------------------------------------------------------------------------------------------------------------------------------------------------------------------------------------------------------------------------------------------------------------------------------------------------------------------------------------------------------------------------------------------------------------------------------------------------------------------------------------------------------------------------------------------------------------------------------------------------------------------------------------------------------------------------------------------------------------------------------------------------------------------------------------------------------------------------------------------------------------------------------------------------------------------------------------------------------------------------------------------------------------------------------------------------------------------------------------------------------------------------------------------------------------------------------------------------------------------------------------------------------------------------------------------------------------------------------------------------------------------------------------------------------------------------------------------------------------------------------------------------------------------------------------------------------------------------------------------------------------------------------------------------------------------------------------------------------------------------------------------------------------------------------------------------------------------------------------------------------------------------------------------------------------------------------------------------------------------------------------------------------------------------------------------------------------|
| Journal:                      | <i>BMJ Open</i>                                                                                                                                                                                                                                                                                                                                                                                                                                                                                                                                                                                                                                                                                                                                                                                                                                                                                                                                                                                                                                                                                                                                                                                                                                                                                                                                                                                                                                                                                                                                                                                                                                                                                                                                                                                                                                                                                                                                                                                                                                                                                                                                                                                                                                               |
| Manuscript ID                 | bmjopen-2018-026362.R2                                                                                                                                                                                                                                                                                                                                                                                                                                                                                                                                                                                                                                                                                                                                                                                                                                                                                                                                                                                                                                                                                                                                                                                                                                                                                                                                                                                                                                                                                                                                                                                                                                                                                                                                                                                                                                                                                                                                                                                                                                                                                                                                                                                                                                        |
| Article Type:                 | Protocol                                                                                                                                                                                                                                                                                                                                                                                                                                                                                                                                                                                                                                                                                                                                                                                                                                                                                                                                                                                                                                                                                                                                                                                                                                                                                                                                                                                                                                                                                                                                                                                                                                                                                                                                                                                                                                                                                                                                                                                                                                                                                                                                                                                                                                                      |
| Date Submitted by the Author: | 25-Mar-2019                                                                                                                                                                                                                                                                                                                                                                                                                                                                                                                                                                                                                                                                                                                                                                                                                                                                                                                                                                                                                                                                                                                                                                                                                                                                                                                                                                                                                                                                                                                                                                                                                                                                                                                                                                                                                                                                                                                                                                                                                                                                                                                                                                                                                                                   |
| Complete List of Authors:     | <p>Zhang, Yan; Peking University First Hospital, Department of Cardiology<br/>         Yu, Bo; Key Laboratories of Education Ministry for Myocardial Ischemia Mechanism and Treatment, 2nd Affiliated Hospital of Harbin Medical University, Cardiology<br/>         Han, YL; The General Hospital of Shenyang Military Region, Department of Cardiology<br/>         Wang, Jianan; The Second Affiliated Hospital, Zhejiang University, Department of Cardiology<br/>         Yang, Lixia; Kunming General Hospital of Chengdu Military Region, Department of Cardiology<br/>         Wan, Zheng; The General Hospital of Tianjin Medical University, department of cardiology<br/>         Zhang, Zheng; The First Hospital of Lanzhou University, department of cardiology<br/>         Chen, Yu-guo; Qilu Hospital of Shandong University, Department of Emergency<br/>         Fu, Xianghua; The Second Hospital of Hebei Medical University, Department of Cardiology<br/>         Gao, Chuanyu; Henan Provincial People's Hospital, Zhengzhou University People's Hospital, Cardiology<br/>         Li, Bao; Shanxi Cardiovascular Hospital, department of cardiology<br/>         Chen, Ji-yan; Guangdong Cardiovascular Institute, Guangdong provincial Key Laboratory of Coronary Heart Disease Prevention, Guangdong General Hospital, Guangdong Academy of Medical Sciences, Cardiology<br/>         Wu, Ming; Hainan General Hospital, Department of cardiology<br/>         Ma, Yitong; The First Affiliated Hospital of Xinjiang Medical University, department of cardiology<br/>         Zhao, Xingsheng; Inner Mongolia People's Hospital, department of cardiology<br/>         Chen, Yundai; Chinese PLA General Hospital, department of cardiology<br/>         Yan, Hongbing; Fuwai Hospital, Chinese Academy of Medical Sciences, department of cardiology<br/>         Xiang, Dingcheng; Guangzhou General Hospital of Guangzhou Military Region, Department of Cardiology<br/>         Fang, Weiyi; Shanghai Chest Hospital, department of cardiology<br/>         Mehta, Sameer; Lumen Foundation<br/>         Naber, Christoph K; Stent Save a Life<br/>         Ge, Junbo; Zhongshan Hospital Fudan University, department of</p> |



1  
2  
3  
4  
5  
6  
7  
8  
9  
10  
11  
12  
13  
14  
15  
16  
17  
18  
19  
20  
21  
22  
23  
24  
25  
26  
27  
28  
29  
30  
31  
32  
33  
34  
35  
36  
37  
38  
39  
40  
41  
42  
43  
44  
45  
46  
47  
48  
49  
50  
51  
52  
53  
54  
55  
56  
57  
58  
59  
60

|                                   |                                                                                            |
|-----------------------------------|--------------------------------------------------------------------------------------------|
|                                   | cardiology<br>Huo, Yong ; Peking University First Hospital,                                |
| <b>Primary Subject Heading</b> :  | Evidence based practice                                                                    |
| <b>Secondary Subject Heading:</b> | Medical management                                                                         |
| <b>Keywords:</b>                  | Accreditation, chest pain center, network, reperfusion, ST-elevation myocardial infarction |
|                                   |                                                                                            |

SCHOLARONE™  
Manuscripts

1  
2  
3  
4 **Protocol of the China ST-segment elevation myocardial infarction (STEMI) Care**  
5  
6 **Project (CSCAP): a 10-year project to improve quality of care by building up a**  
7  
8 **regional STEMI care network**  
9  
10

11  
12  
13  
14 Yan Zhang<sup>1</sup>, Bo Yu<sup>2</sup>, Yaling Han<sup>3</sup>, Jianan Wang<sup>4</sup>, Lixia Yang<sup>5</sup>, Zheng Wan<sup>6</sup>, Zheng  
15  
16 Zhang<sup>7</sup>, Yuguo Chen<sup>8</sup>, Xianghua Fu<sup>9</sup>, Chuanyu Gao<sup>10</sup>, Bao Li<sup>11</sup>, Jiyan Chen<sup>12</sup>, Ming  
17  
18 Wu<sup>13</sup>, Yitong Ma<sup>14</sup>, Xingsheng Zhao<sup>15</sup>, Yundai Chen<sup>16</sup>, Hongbing Yan<sup>17</sup>, Dingcheng  
19  
20 Xiang<sup>18</sup>, Weiyi Fang<sup>19</sup>, Sameer Mehta<sup>20</sup>, Christoph K. Naber<sup>21</sup>, Junbo Ge<sup>22</sup>, \*Yong  
21  
22 Huo<sup>1</sup>, on behalf of China STEMI Care Project (CSCAP) Investigators  
23  
24  
25  
26  
27  
28  
29

- 30 1. Department of Cardiology, Peking University First Hospital, Beijing, China  
31  
32 2. Department of Cardiology, The Second Affiliated Hospital of Harbin Medical  
33  
34 University, Harbin, Heilongjiang Province, China  
35  
36 3. Department of Cardiology, The General Hospital of Shenyang Military Region,  
37  
38 Shenyang, Liaoning Province, China  
39  
40 4. Department of Cardiology, The Second Affiliated Hospital Zhejiang University  
41  
42 School of Medicine, Hangzhou, Zhejiang Province, China  
43  
44 5. Department of Cardiology, Kunming General Hospital of Chengdu Military  
45  
46 Region, Kunming, Yunnan Department of Cardiology, China  
47  
48 6. Department of Cardiology, Tianjin Medical University General Hospital, Tianjin,  
49  
50 China  
51  
52 7. Department of Cardiology, The First Hospital of Lanzhou University, Lanzhou,  
53  
54  
55  
56  
57  
58  
59  
60

1  
2  
3  
4 Gansu Province, China  
5

6  
7 8. Department of Emergency, Qilu Hospital of Shandong University, Jinan,  
8  
9 Shandong Province, China  
10

11  
12 9. Department of Cardiology, The Second Hospital of Hebei Medical University,  
13  
14 Shijiazhuang, Hebei Province, China  
15

16  
17 10. Department of Cardiology, Henan Provincial People's Hospital, Zhengzhou,  
18  
19 Henan Province, China  
20

21  
22 11. Department of Cardiology, Shanxi Cardiovascular Hospital, Taiyuan, Shanxi  
23  
24 Province, China  
25

26  
27 12. Department of Cardiology, Guangdong General Hospital, Guangzhou,  
28  
29 Guangdong Province, China  
30

31  
32 13. Department of Cardiology, Hainan General Hospital, Haikou, Hainan Province,  
33  
34 China  
35

36  
37 14. Department of Cardiology, The First Affiliated Hospital of Xinjiang Medical  
38  
39 University, Urumchi, The Xinjiang Uygur Autonomous Region, China  
40

41  
42 15. Department of Cardiology, Inner Mongolia People's Hospital, Hohhot, The Inner  
43  
44 Mongolia Autonomous Region, China  
45

46  
47 16. Department of Cardiology, Chinese PLA General Hospital, Beijing, China  
48

49  
50 17. Department of Cardiology, Fuwai Hospital, Chinese Academy of Medical  
51  
52 Sciences, Beijing, China  
53

54  
55 18. Department of Cardiology, Guangzhou General Hospital of Guangzhou Military  
56  
57 Region, Guangzhou, Guangdong Province, China  
58  
59  
60

- 1  
2  
3  
4 19. Department of Cardiology, Shanghai Chest Hospital, Shanghai, China  
5  
6  
7 20. Lumen Foundation, Miami, USA  
8  
9  
10  
11  
12 22. Department of Cardiology, Zhongshan Hospital Fudan University, Shanghai,  
13  
14  
15  
16  
17  
18  
19  
20  
21  
22  
23  
24  
25  
26  
27  
28  
29  
30  
31  
32  
33  
34  
35  
36  
37  
38  
39  
40  
41  
42  
43  
44  
45  
46  
47  
48  
49  
50  
51  
52  
53  
54  
55  
56  
57  
58  
59  
60
- China

**Running title:** Protocol of China STEMI Care Project

**Corresponding author:** Yong Huo, MD

Department of Cardiology, Peking University First Hospital

8 Xishiku St, Xicheng District, Beijing 100034, China

Email: huoyong@263.net.cn

Phone: 86-10-83572283

Fax: 86-10-66137748

**Date:**

This study was initiated in 2011 and will be completed in 2021. Phase 1 (CSCAP-1) is conducted from 2011 to 2013, Phase 2 (CSCAP-2) is conducted from 2015 to 2018, and Phase 3 (CSCAP-3) is conducted from 2018 to 2021, respectively.

## Abstract

**Introduction:** Successful ST-segment elevation myocardial infarction (STEMI) management is time-sensitive and is based on prompt reperfusion mainly to reduce patient mortality. It has evolved from a single hospital care to an integrated regional network approach over the last decades. This prospective study, named the China STEMI Care Project (CSCAP), aims to show how implementation of different types of integrated regional STEMI care networks can improve the reperfusion treatment rate, shorten the total duration of myocardial ischemia, and lead to mortality reduction step by step.

**Methods and analysis:** The CSCAP is a prospective, multicenter registry study of 3 phases. A total of 18 provinces, 4 municipalities and 2 autonomous regions in China were included. Patients who meet the third universal definition of myocardial infarction and the Chinese STEMI diagnosis and treatment guidelines are enrolled. Phase 1 (CSCAP-1) focuses on the in-hospital process optimization of primary percutaneous coronary intervention (PPCI) hospitals, phase 2 (CSCAP-2) focuses on the PPCI hospital-based regional STEMI care network construction together with emergency medical services and adjacent non-PPCI hospitals, while phase 3 (CSCAP-3) focuses on the whole-city STEMI care network construction by promoting chest pain center accreditation. Systematic data collection, key performance index assessment and subsequent improvement are implemented throughout the project to continuously improve the quality of STEMI care.

**Ethics and dissemination:** The study has been reviewed and approved by the Ethics

1  
2  
3  
4 Committee of Peking University First Hospital. Ranking reports of quality of care will  
5  
6 be generated available to all participant affiliations. Results will be disseminated via  
7  
8 peer-reviewed scientific journals and presentations at congresses.  
9  
10

11 **Trial registration number:** NCT03821012  
12  
13

### 14 15 16 **Strengths and limitations of this study** 17

- 18  
19 ➤ CSCAP is the first project focuses on establishing an integrated regional STEMI  
20  
21 care network in China through in-hospital process optimization, PPCI  
22  
23 hospital-based regional STEMI care network construction and whole-city STEMI  
24  
25 care network construction step by step, which will help us to understand the  
26  
27 situations extensively and then improve accordingly.  
28  
29
- 30  
31 ➤ Evaluation, feedback and improvement system will be established, aiming to  
32  
33 provide a tailored and continuous quality of care improvement plan based on the  
34  
35 conditions of different regions to further integrate the STEMI care network  
36  
37 nationwide.  
38  
39
- 40  
41 ➤ Hospitals are not randomly selected in CSCAP which might be lead to lack of  
42  
43 representatives to some degree. However, these hospitals are at a high level in  
44  
45 their region which is suitable to be core centers for regional network construction.  
46  
47 Their experiences could be valuable for hospitals in the same region but not in  
48  
49 this study.  
50  
51  
52  
53  
54  
55  
56  
57  
58  
59  
60

## Introduction

The burden of cardiovascular diseases is increasing and posing a major public health issue worldwide. The number of new onset of myocardial infarction will be tremendous in China in the next 15 years with the increasing risk factors and aging population [1]. The Chinese cardiovascular report in 2017 has shown an increase in both the percentage of hospitalization and mortality of acute myocardial infarction (AMI) over the years. The trends of fast growth nationwide as well as higher AMI mortality in rural areas in were observed since 2005 and 2013, respectively [2].

ST-elevation myocardial infarction (STEMI), mainly caused by a sudden obstruction of the coronary artery with thrombus, benefits from both increasing reperfusion rate and shortening of the duration from the symptom occurrence to the opening of the target vessel [3 4]. Although implementing an evidence-based medicine significantly improves the prognosis of patients with STEMI, the gap of clinical application is still large in real-world settings [5]. A majority of Chinese STEMI patients miss the optimal treatment timing due to restrictions from both patients and medical services [6 7]. Additionally, the ratio of STEMI reperfusion treatment remained at the level of around 55% in the last decade. Hence, the in-hospital mortality has not changed significantly yet [7].

Successful treatment of STEMI is a systemic issue, and the solution is neither a novel thrombolytic drug nor an intervention device. It can be brought about by comprehensive factors, including the patients' health awareness, physician's skill, physician-patient's relationship, medical reimbursement system, prehospital

1  
2  
3  
4 emergency medical system (EMS), in-hospital treatment, connection mechanism  
5  
6 between prehospital and in-hospital care, and posthospital management. Experiences  
7  
8 from both the American Lifeline program and the European Stent – Save a Life can  
9  
10 be used for reference. The quality of medical care can be significantly improved by  
11  
12 establishing a regional STEMI care network through close collaboration between  
13  
14 hospitals of different levels and EMS [8 9].  
15  
16  
17  
18

19  
20 Although large-scale studies have been conducted in China, such as Clinical  
21  
22 Pathways for Acute Coronary Syndromes in China (CPACS) focusing on the ACS  
23  
24 clinical pathway, Cardiovascular Disease in China (CCC) focusing on the in-hospital  
25  
26 treatment of acute coronary syndrome (ACS), China Acute Myocardial Infarction  
27  
28 (CAMI) Registry focusing on the management of both STEMI and non-STEMI, and  
29  
30 China Patient-centered Evaluative Assessment of Cardiac Events Retrospective Study  
31  
32 of Acute Myocardial Infarction (China PEACE-Retrospective AMI Study), none of  
33  
34 them focused on establishing a regional STEMI care network [7 10-12]. Serial  
35  
36 documents issued by the National Health Commission of China provide favorable  
37  
38 government supports and further emphasize the important rolls of administrative  
39  
40 departments of health care at all levels in strengthening the construction of regional  
41  
42 emergency care network [13-15].  
43  
44  
45  
46  
47  
48  
49

50  
51 China has gradually increased the input of medical expense in the last few decades.  
52  
53 However, there are several types of medical insurances with different reimbursement  
54  
55 policy in China. The impacts of health economic factors as well as geographical and  
56  
57 humanistic factors on quality of STEMI care need to be discussed either.  
58  
59  
60



## Objectives

The 10-year project, named as China STEMI Care Project (CSCAP), aims to show how implementation of different types of integrated regional STEMI care networks can improve the reperfusion treatment rate, shorten the total duration of myocardial ischemia, and lead to mortality reduction step by step. It will also provide useful information when building up a STEMI care network in other similar regions. In details, CSCAP focuses on improving the awareness of health and emergency treatment for STEMI patients, increasing the ratio of reperfusion treatment, shortening the overall duration of myocardial ischemia, and implementing standard secondary prevention to improve the long-term prognosis by establishing and optimizing medical care evaluation, feedback and improvement system with data support.

## Methods and analysis

### Study design

CSCAP is a prospective multicenter registry containing 3 phases. Phase 1 of CSCAP (CSCAP-1) focuses on the in-hospital process optimization of primary percutaneous coronary intervention (PPCI) hospitals. Phase 2 of CSCAP (CSCAP-2) focuses on the PPCI hospital-based regional STEMI care network construction with their adjacent non-PPCI hospitals and EMS. Phase 3 of CSCAP (CSCAP-3) focuses on the whole-city STEMI care network construction by promoting chest pain center (CPC) accreditation (Fig. 1). Systematic data collection, assessment of quality of care and subsequent improvement are implemented throughout this study to continuously

1  
2  
3  
4 improve the quality of care.  
5

## 6 **Organizational framework**

7  
8  
9 CSCAP was established by the Chinese Medical Doctor Association and supported by  
10  
11 the National Health Commission of China in 2011. After collaborating with the  
12  
13 European Stent – Save a Life in CSCAP-3, China became its member country in 2017.  
14  
15 The project office, executive committee and steering committee were set up for the  
16  
17 purposes of management, implementation and academic support. Data management  
18  
19 and statistical analyses were conducted by the School of Public Health of Peking  
20  
21 University.  
22  
23  
24  
25

## 26 **Site selection**

27  
28  
29 CSCAP included 18 provinces (Anhui, Fujian, Gansu, Guangdong, Guangxi, Hainan,  
30  
31 Hebei, Heilongjiang, Henan, Hubei, Jiangsu, Liaoning, Shandong, Shanxi, Shaanxi?,  
32  
33 Sichuan, Yunnan, and Zhejiang), 4 municipalities (Beijing, Chongqing, Shanghai, and  
34  
35 Tianjin) and 2 autonomous regions (Inner Mongolia and Xinjiang) in China when  
36  
37 considering incidence of STEMI, logistic as well as economic issues.  
38  
39  
40  
41

42  
43 A total of 53 tertiary hospitals qualified for PPCI in 10 provinces, 2 municipalities  
44  
45 and 2 autonomous regions of China were enrolled in CSCAP-1. The qualification of  
46  
47 these selected hospitals was based on the numbers of PCI cases and cardiovascular  
48  
49 interventionists extracted from the national PCI registry database. Moreover, all of  
50  
51 them are able to provide 24/7 PPCI service. These hospitals were selected because  
52  
53 they were at the top level in their city and potentially a hub for regional network  
54  
55 construction in CSCAP-2. A total of 244 PCI hospitals with adjunct non-PCI hospitals  
56  
57  
58  
59  
60

1  
2  
3  
4 from 18 provinces, 4 municipalities and 2 autonomous regions were selected to build  
5  
6 up the regional STEMI care network in CSCAP-2. A total of 7 cities (Harbin,  
7  
8 Hangzhou, Nanning, Qingdao, Shenzhen, Suzhou, and Taiyuan) from 6 provinces and  
9  
10 1 autonomous region with different EMS types were selected to build up the  
11  
12 whole-city STEMI care network in CSCAP-3.  
13  
14  
15

### 16 **Patient enrollment**

17  
18 Patients who met with the third universal definition of myocardial infarction and the  
19  
20 Chinese STEMI diagnosis and treatment guidelines were enrolled [16 17]. STEMI  
21  
22 patients with late admission to hospitals were also considered for the purpose of  
23  
24 exploring optimal methods to shorten total ischemic time causing by both patient and  
25  
26 system delay. All patients received routine clinical assessments and treatments  
27  
28 without any experimental intervention. The updated guideline-directed management  
29  
30 such as reperfusion, auxiliary device implementation, elective revascularization,  
31  
32 medications and therapeutic lifestyle change will be implemented during the whole  
33  
34 study period.  
35  
36  
37  
38  
39  
40  
41  
42

43 In CSCAP-1, a total of 4,191 hospitalized patients, with symptom onset within 12 h  
44  
45 regardless of whether receiving reperfusion or symptom onset within 12–24 h but still  
46  
47 need PPCI, were enrolled consecutively in 2012. In CSCAP-2, a total of 20,799  
48  
49 patients with STEMI occurrence within 30 days regardless of reperfusion were  
50  
51 enrolled consecutively from PPCI hospitals 3 times at a 6-month interval from 2015  
52  
53 to 2017. In CSCAP-3, a total of 30 hospitalized STEMI patients with symptom onset  
54  
55 within 30 days will be enrolled consecutively from both PCI and non-PCI hospitals in  
56  
57  
58  
59  
60

1  
2  
3  
4 the whole-city network every 3 months. Those patients who survived after hospital  
5  
6 discharge will be followed up for 1 year.  
7

### 8 9 **Regional network construction**

10  
11 An integrated regional network contains PCI hospitals, non-PCI hospitals and EMS.  
12  
13 There are 3 major types of EMS in China: (1) independent EMS, which has its own  
14  
15 ambulances; (2) commanding EMS, which does not have its own ambulances and  
16  
17 uses hospital ambulances; and (3) affiliated EMS, which is based in hospitals and uses  
18  
19 their ambulances. Due to these comprehensive situations, patients may not be  
20  
21 transported to optimal hospitals to receive effective treatment in the shortest period  
22  
23 because of incomplete communication [18]. Thus, prehospital information  
24  
25 transmission should be considered accordingly for hospital alert and rapid and  
26  
27 accurate transfer.  
28  
29  
30  
31  
32  
33

34  
35 Although PPCI is the most effective treatment for STEMI, it is difficult to be  
36  
37 implemented in most of the primary hospitals, as they are limited by medical  
38  
39 condition, geographic location and techniques. Early thrombolysis and/or transfer PCI  
40  
41 strategy are the priority in these hospitals. Therefore, rapid identification of STEMI  
42  
43 and referral to a hospital with PPCI ability are extremely important components in  
44  
45 establishing a regional STEMI care network in China.  
46  
47  
48  
49

50  
51 Optimizing the in-hospital green channel can significantly shorten the  
52  
53 door-to-balloon (D2B) time and door-to-needle (D2N) time, while establishing a CPC  
54  
55 to integrate multiple resources is one of the most important methods [19 20].  
56  
57 Traditional CPC focuses on the optimization and integration of the in-hospital sources  
58  
59  
60

1  
2  
3  
4 aiming to shorten the time of the process. The medical system and patient factors  
5  
6 together determine the delay in STEMI emergency treatment [21]. The concept of a  
7  
8 modern CPC expands to establishing an effective regional network aiming to shorten  
9  
10 the total ischemia duration, thereby maximizing the advantage of reperfusion therapy.  
11  
12 The CPC independent accreditation in China was initiated in 2013 and 2 types  
13  
14 accreditation standards were developed according to PPCI ability [22 23].  
15  
16  
17  
18

### 19 **Procedures**

20  
21  
22 The treatment process of patients suffered STEMI was based on the STEMI protocol  
23  
24 in the Announcement of Improving Medical Emergency Treatment Performance of  
25  
26 Acute Cardiovascular and Cerebrovascular Diseases issued by the National Health  
27  
28 Commission of China in 2015 [15]. Briefly, this flow chart included 1 center (EMS),  
29  
30 2 types of hospitals (PCI and non-PCI), 3 types of transfer methods (EMS transfer to  
31  
32 hospital, bypass emergency department (ED) and inter-hospital transfer), and 11  
33  
34 clinical pathways. Different clinical pathways were selected to execute the optimal  
35  
36 emergency treatment based on the approaching time, method and hospital ability  
37  
38 (Fig. 2). In addition, the procedures should be launched without results of myocardial  
39  
40 biomarkers according to typical ischemic symptoms and electrocardiogram (ECG).  
41  
42  
43  
44  
45  
46  
47

### 48 **Data collection and management**

49  
50 Data of all treatment process were collected, including patient general information,  
51  
52 prehospital treatment, in-hospital management and follow-up management (Table 1).  
53  
54 Considering the real situation in ED, many time points could not be recorded  
55  
56 manually on time which might lead to missing and inaccurate data. Mobile device app  
57  
58  
59  
60

1  
2  
3  
4 can record these time variables through a simple click and complete the prehospital  
5  
6 ECG transmission. In addition, the technique of data auto-capture becomes  
7  
8 more and more popular at present and should resolve this issue. All of these methods  
9  
10 are considered gradually in this study.  
11  
12

13  
14 Data were inputted into a self-built electronic database together with two existing  
15  
16 databases of both CPC accreditation and national PCI registry by trained clinical  
17  
18 research coordinators and clinicians in each hospital. The quality of the data was  
19  
20 monitored and suspicious contents with missing, outlier and logical errors were  
21  
22 mainly reviewed. When all problems are resolved, the database is then locked for  
23  
24 statistical analysis.  
25  
26  
27  
28

29  
30 The describing method was used in CSCAP to mainly rank data quality and  
31  
32 medical quality. Continuous variables were described as mean (standard deviation) or  
33  
34 median (interquartile range), while categorical variables were described as a  
35  
36 percentage. Multivariate regression model was used to evaluate the factors related to  
37  
38 the assessment of medical quality. The Cox model was used to analyze the association  
39  
40 between exposures and medical outcomes. A  $P$  value  $< 0.05$  was defined as a  
41  
42 significant difference. All analyses were performed using R  
43  
44 (<http://www.R-project.org>).  
45  
46  
47  
48  
49

### 50 **Key performance index**

51  
52  
53 The National Cardiovascular Data Registry (NCDR), established since 1997, has  
54  
55 become the basis for project implementation and quality evaluation as well as medical  
56  
57 quality improvement of research centers in the United States. It has a positive impact  
58  
59  
60

1  
2  
3  
4 on clinical practice, medical payment, clinical research and government  
5  
6 decision-making [24 25]. The present study referred to the NCDR model to optimize  
7  
8 the STEMI quality of care and established an evaluation, feedback and improvement  
9  
10 system for primary key performance indexes (KPIs). For KPI selection, PPCI  
11  
12 hospitals focused on the improvement in the PPCI capacity and efficiency, non-PPCI  
13  
14 hospitals focused on the improvement in rapid diagnosis, thrombolysis and referral  
15  
16 capacity to PPCI hospitals, and EMS focused on the improvement in information  
17  
18 transmission to alert hospitals early for rapid and accurate transfer.  
19  
20  
21  
22  
23  
24

25 A total of 13 primary KPIs were selected for medical quality evaluation based on  
26  
27 different roles of EMS and hospitals in STEMI management (Table 2). However,  
28  
29 different treatment delay indexes were used in different phases according to the  
30  
31 progress of network construction. D2N and D2B time, defined as in-hospital FMC to  
32  
33 target vessel open, were used to evaluate in-hospital delay in CSCAP-1. First medical  
34  
35 contact-to-balloon (FMC2B) time and first medical contact-to-needle (FMC2N) time,  
36  
37 defined as FMC by emergency system or hospital to target vessel open, were used to  
38  
39 evaluate the whole medical system delay in CSCAP-2. Total ischemic time, defined  
40  
41 as symptom onset to target vessel open, is used in CSCAP-3 to add the information of  
42  
43 patient delay.  
44  
45  
46  
47  
48  
49

50 The circular enrollment–evaluation–feedback–improvement method will be  
51  
52 implemented in both CSCAP-2 and CSCAP-3. The quality feedback report contains  
53  
54 each KPI of the affiliation and its ranking within its regional network and among all  
55  
56 affiliations. Comparisons of KPIs with itself and those of others are analyzed for  
57  
58  
59  
60

1  
2  
3  
4 tailed improvements.  
5  
6  
7

## 8 **Patient and public involvement**

9

10 Public education of first aid and health care will be performed during the project  
11 implementation. Patients were not offered the opportunity to participate in the study  
12 design. They will obtain the information related to the study via public media as well  
13 as academic publications.  
14  
15  
16  
17  
18  
19

## 20 **Ethics and dissemination**

21  
22

23 The study was conducted in accordance with Declaration of Helsinki. The study  
24 protocol was approved by the Ethics Committee of Peking University First Hospital.  
25  
26 Ranking reports of quality of care will be made available to all participant affiliations.  
27  
28 Results will be disseminated at international conferences and published in  
29 peer-reviewed scientific journals or public media.  
30  
31  
32  
33  
34  
35  
36  
37  
38  
39

## 40 **Discussion**

41

42 The integration and optimization of an integrated regional network with government  
43 support are urgent issues of STEMI care, especially in China. CSCAP is the first  
44 prospective registry study focused on regional network construction and will help to  
45 understand the current situations and the differences with other countries extensively,  
46 which leading to optimized clinical practice and problem-guided improvement. It will  
47 provide important information for the network construction shifting from the PPCI  
48 hospital-centered regional network to the whole-city network step by step, so as to  
49  
50  
51  
52  
53  
54  
55  
56  
57  
58  
59  
60



1  
2  
3  
4 create an optimal integrate STEMI care system in China.  
5  
6  
7  
8

9 **Contributions** Yan Zhang coordinated the study, assisted with data collection,  
10 performed data analysis, and drafted the manuscript. Bo Yu, Yaling Han, Jianan  
11 Wang, Lixia Yang, Zheng Wan, Zheng Zhang, Yuguo Chen, Xianghua Fu, Chuanyu  
12 Gao, Bao Li, Jiyan Chen, Ming Wu, Yitong Ma, Xingsheng Zhao, Yundai Chen,  
13 Hongbing Yan, Dingcheng Xiang, Weiyi Fang, and Junbo Ge carried out the data  
14 collection and helped draft the manuscript. Sameer Mehta and Christoph K Naber  
15 participated in the design and helped draft the manuscript. Yong Huo, principal  
16 investigator of the project, conceived and designed the project, helped collect data and  
17 draft the manuscript. All authors reviewed the results and approved the final version  
18 of the manuscript.  
19  
20  
21  
22  
23  
24  
25  
26  
27  
28  
29  
30  
31  
32  
33  
34  
35  
36  
37

### 38 **Acknowledgments**

39  
40 The authors thank the study team members and patient advisers of all  
41 collaborative hospitals and emergency medical services. They are also grateful to the  
42 organizational coordination of Chinese Medical Doctor Association and China  
43 Cardiovascular Association. They acknowledge the supports provided by the National  
44 Health Commission and local governments in China.  
45  
46  
47  
48  
49  
50  
51  
52  
53  
54  
55

56 **Funding** CSCAP was funded by Sanofi-Aventis, Abbott, and AstraZeneca.  
57

58 **Competing interests** None declared.  
59  
60

1  
2  
3  
4 **Patient consent for publication** Not required.  
5

6 **Ethics approval** This study was reviewed and approved by the Ethics Committees  
7  
8  
9 at Peking University First Hospital.  
10  
11  
12  
13  
14  
15  
16  
17  
18  
19  
20  
21  
22  
23  
24  
25  
26  
27  
28  
29  
30  
31  
32  
33  
34  
35  
36  
37  
38  
39  
40  
41  
42  
43  
44  
45  
46  
47  
48  
49  
50  
51  
52  
53  
54  
55  
56  
57  
58  
59  
60

For peer review only

## References

1. Stevens W, Peneva D, Li JZ, et al. Estimating the future burden of cardiovascular disease and the value of lipid and blood pressure control therapies in China. *BMC health services research* 2016;**16**:175.
2. *Report on cardiovascular disease in China*: Encyclopedia of China Publishing house, 2017.
3. O'Gara PT, Kushner FG, Ascheim DD, et al. 2013 ACCF/AHA guideline for the management of ST-elevation myocardial infarction: a report of the American College of Cardiology Foundation/American Heart Association Task Force on Practice Guidelines. *Circulation* 2013;**127**:e362-425.
4. Task Force on the management of ST-segment elevation acute myocardial infarction of the European Society of Cardiology (ESC), Steg PG, James SK, et al. ESC Guidelines for the management of acute myocardial infarction in patients presenting with ST-segment elevation. *European heart journal* 2012;**33**:2569-619.
5. Eagle KA, Nallamothu BK, Mehta RH, et al. Trends in acute reperfusion therapy for ST-segment elevation myocardial infarction from 1999 to 2006: we are getting better but we have got a long way to go. *European heart journal* 2008;**29**:609-17.
6. Song L, Hu DY, Yan HB, et al. Influence of ambulance use on early reperfusion therapies for acute myocardial infarction. *Chinese medical journal* 2008;**121**:771-5.

- 1  
2  
3  
4 7. Li J, Li X, Wang Q, et al. ST-segment elevation myocardial infarction in China  
5  
6 from 2001 to 2011 (the China PEACE-Retrospective Acute Myocardial  
7  
8 Infarction Study): a retrospective analysis of hospital data. *Lancet*  
9  
10 2015;**385**:441-51.  
11  
12
- 13  
14 8. Jollis JG, Granger CB, Henry TD, et al. Systems of care for ST-segment-elevation  
15  
16 myocardial infarction: a report From the American Heart Association's  
17  
18 Mission: Lifeline. *Circulation. Cardiovascular quality and outcomes*  
19  
20 2012;**5**:423-8.  
21  
22
- 23  
24 9. Kristensen SD, Fajadet J, Di Mario C, et al. Implementation of primary angioplasty  
25  
26 in Europe: stent for life initiative progress report. *EuroIntervention : journal of*  
27  
28 *EuroPCR in collaboration with the Working Group on Interventional*  
29  
30 *Cardiology of the European Society of Cardiology* 2012;**8**:35-42.  
31  
32
- 33  
34 10. Gao R, Patel A, Gao W, et al. Prospective observational study of acute coronary  
35  
36 syndromes in China: practice patterns and outcomes. *Heart* 2008;**94**:554-60.  
37  
38
- 39  
40 11. Hao Y, Liu J, Liu J, et al. Rationale and design of the Improving Care for  
41  
42 Cardiovascular Disease in China (CCC) project: A national effort to prompt  
43  
44 quality enhancement for acute coronary syndrome. *American heart journal*  
45  
46 2016;**179**:107-15.  
47  
48
- 49  
50 12. Xu H, Li W, Yang J, et al. The China Acute Myocardial Infarction (CAMI)  
51  
52 Registry: A national long-term registry-research-education integrated platform  
53  
54 for exploring acute myocardial infarction in China. *American heart journal*  
55  
56 2016;**175**:193-201.e3.  
57  
58  
59  
60

- 1  
2  
3  
4 13. Pre-hospital medical emergency management measures. *Chinese Village Medicine*  
5  
6 2014;85-86. (In Chinese)  
7  
8  
9 14. National Health Commission of China. Guiding Principles for Construction and  
10  
11 Management of Chest Pain Center (Trial). 2017. (In Chinese)  
12  
13  
14 15. National Health Commission of China. The Announcement of Improving Medical  
15  
16 Emergency Treatment Performance of Acute Cardiovascular and  
17  
18 Cerebrovascular Diseases. 2015. (In Chinese)  
19  
20  
21  
22 16. Thygesen K, Alpert JS, Jaffe AS, et al. Third universal definition of myocardial  
23  
24 infarction. *Circulation* 2012;**126**:2020-35.  
25  
26  
27 17. Chinese Society of Cardiology, Editorial board of Chinese Journal of Cardiology.  
28  
29 Guidelines for the diagnosis and treatment of acute ST segment elevation  
30  
31 myocardial infarction. *Chinese Journal of Cardiology* 2015;**43**:380-93. (In  
32  
33 Chinese)  
34  
35  
36  
37 18. Ranasinghe I, Rong Y, Du X, et al. System barriers to the evidence-based care of  
38  
39 acute coronary syndrome patients in China: qualitative analysis. *Circulation.*  
40  
41 *Cardiovascular quality and outcomes* 2014;**7**:209-16.  
42  
43  
44  
45 19. Bradley EH, Herrin J, Wang Y, et al. Strategies for reducing the door-to-balloon  
46  
47 time in acute myocardial infarction. *The New England journal of medicine*  
48  
49 2006;**355**:2308-20.  
50  
51  
52  
53 20. Graff LG, Dallara J, Ross MA, et al. Impact on the care of the emergency  
54  
55 department chest pain patient from the chest pain evaluation registry  
56  
57 (CHEPER) study. *The American journal of cardiology* 1997;**80**:563-8.  
58  
59  
60

- 1  
2  
3  
4 21. Windecker S, Bax JJ, Myat A, et al. Future treatment strategies in ST-segment  
5  
6 elevation myocardial infarction. *Lancet* 2013;**382**:644-57.  
7  
8  
9 22. China Chest Pain Center Accreditation Work Committee. Standard for Chinese  
10  
11 Chest Pain Center accreditation. *Chinese Journal of Interventional Cardiology*  
12  
13 2016;**24**:121-30. (In Chinese)  
14  
15  
16 23. China Chest Pain Center Accreditation Work Committee. Standard for Chinese  
17  
18 Primary Chest Pain Center accreditation. *Chinese Journal of Interventional*  
19  
20 *Cardiology* 2016;**24**:131-33. (In Chinese)  
21  
22  
23 24. Diercks DB, Kontos MC, Chen AY, et al. Utilization and impact of pre-hospital  
24  
25 electrocardiograms for patients with acute ST-segment elevation myocardial  
26  
27 infarction: data from the NCDR (National Cardiovascular Data Registry)  
28  
29 ACTION (Acute Coronary Treatment and Intervention Outcomes Network)  
30  
31 Registry. *Journal of the American College of Cardiology* 2009;**53**:161-6.  
32  
33  
34 25. Krim SR, Vivo RP, Krim NR, et al. Regional differences in clinical profile,  
35  
36 quality of care, and outcomes among Hispanic patients hospitalized with acute  
37  
38 myocardial infarction in the Get with Guidelines-Coronary Artery Disease  
39  
40 (GWTG-CAD) registry. *American heart journal* 2011;**162**:988-95. e4.  
41  
42  
43  
44  
45  
46  
47  
48  
49  
50  
51  
52  
53  
54  
55  
56  
57  
58  
59  
60

**Table 1. CSCAP data elements**

| Category                     | Example elements                                                                                                                                                                                                                                                                                                                                                                                     |
|------------------------------|------------------------------------------------------------------------------------------------------------------------------------------------------------------------------------------------------------------------------------------------------------------------------------------------------------------------------------------------------------------------------------------------------|
| Patient baseline information | Demographics (age, sex, ethnicity, region, occupation, marriage status, and medical insurance type)<br><br>Risk factors (smoking status, BMI, hypertension, diabetes, dyslipidemia, chronic kidney disease, peripheral artery disease, MI history, stroke history, and prior revascularization)<br><br>Clinical presentation (blood pressure, heart rate, and cardiac function classification)       |
| Prehospital information      | Patient (symptoms, symptom onset time, and hospital approaching method)<br><br>EMS (response time, transfer process, first ECG time, ECG transmission ratio, and bypass ED ratio)<br><br>Non-PCI hospital (hospital approaching method, first medical contact time, admission time, first ECG time, diagnosis time, consent time, reperfusion and other treatment, DI-DO time, and transfer process) |
| PCI hospital information     | Reperfusion (methods, indication and contraindication, and nonreperfusion reasons)<br><br>Treatment delay (hospital approaching method, first medical contact time, bypass ED ratio, admission time, first ECG time,                                                                                                                                                                                 |

1  
2  
3  
4 catheter lab ready time, consent time, D2B, D2N, FMC2B,  
5  
6 FMC2N, total ischemic time, and reasons of delay)  
7  
8  
9 PCI procedures (operative route, coronary angiography  
10  
11 results, aspiration, culprit vessels, stent, and elective PCI)  
12  
13  
14 Thrombolytic procedures (thrombolytic agent, dose, and  
15  
16 outcome)  
17  
18  
19 Medications (loading dose DAPT and statin, antiplatelets,  
20  
21  $\beta$ -blockers, statin, ACEI/ARB, GP IIb/IIIa inhibitor, and  
22  
23 anticoagulant with dose and contraindication information)  
24  
25  
26 Laboratory results (troponin, CK-MB, creatinine, HbA1c,  
27  
28 fasting glucose, BNP or NT-proBNP, lipid profiles, ECG, and  
29  
30 UCG)  
31  
32  
33  
34 Discharge (diagnosis, in-hospital duration, expense, and  
35  
36 medications)  
37  
38  
39 Outcomes (death, non-fatal reinfarction, nonfatal stroke,  
40  
41 revascularization, mechanical complication, and bleeding)  
42  
43  
44  
45 Follow-up and management Presentation status (symptom, cardiac function classification,  
46  
47 blood pressure, heart rate, and follow-up on-time ratio)  
48  
49  
50 Laboratory results (lipid profiles, glucose traits, HbA1c,  
51  
52 creatinine, hemoglobin, BNP or NT-proBNP, ECG, and  
53  
54 UCG)  
55  
56  
57 Medications (antiplatelets,  $\beta$ -blockers, statin, and ACEI/ARB)  
58  
59  
60



1  
2  
3  
4 Risk factor control rate (Blood pressure, lipid, glucose, and  
5  
6 smoking cessation)  
7

8  
9 Outcomes (death, nonfatal reinfarction, stroke,  
10  
11 revascularization, rehospitalization due to unstable angina  
12  
13 pectoris, heart failure or other cardiovascular reasons, and  
14  
15 bleeding)  
16  
17  
18

---

19 ACEI, Angiotensin-converting enzyme inhibitor; ARB, angiotensin receptor blocker;  
20  
21 BMI, body mass index; BNP, brain natriuretic peptide; CK-MB, creatine kinase MB  
22  
23 isoenzyme; DAPT, dual antiplatelet therapy; D2B, door to balloon; D2N, door to  
24  
25 needle; DI–DO, door in–door out; ECG, electrocardiograph; ED, emergency  
26  
27 department; EMS, emergency medical service; FMC2B, first medical contact to  
28  
29 balloon; FMC2N, first medical contact to needle injection; GP IIb/IIIa, glycoprotein  
30  
31 IIb/IIIa; HbA1c, glycosylated hemoglobin A1c; MI, myocardial infarction;  
32  
33 NT-ProBNP, N-terminal pro–brain natriuretic peptide; PCI, percutaneous coronary  
34  
35 intervention; UCG, ultrasound cardiogram.  
36  
37  
38  
39  
40  
41  
42  
43  
44  
45  
46  
47  
48  
49  
50  
51  
52  
53  
54  
55  
56  
57  
58  
59  
60

**Table 2. Primary performance measures for evaluating medical care quality**

---

**Primary performance measures**

---

**Prehospital care**

Symptom onset to arrival in hospital (min)

Hospital admission ratio via ambulance (%)

Prehospital ECG transmission ratio (%)

Bypass ED ratio in patients with symptom onset within 12 h (%)

**Reperfusion**

Overall reperfusion ratio (%)

Thrombolysis ratio in patients with symptom onset within 12 h (%)

Primary PCI ratio in patients with symptom onset within 12 h (%)

D2B in patients with symptom onset within 12 h (min)

D2N in patients with symptom onset within 12 h (min)

**Discharge**Usage of both DAPT, statin,  $\beta$  blocker, and ACEI/ARB in patients without contraindication (%)**Outcomes**

In-hospital mortality (%)

**Follow-up and management**

1-Year on-time follow-up ratio (%)

1-Year MACE (%), including mortality, non-fatal myocardial infarction, non-fatal stroke, and hospitalization due to heart failure or acute coronary syndrome

---

ACEI, Angiotensin-converting enzyme inhibitor; ARB, angiotensin receptor blocker;

1  
2  
3  
4 DAPT, dual antiplatelet therapy; D2B, door to balloon; D2N, door to needle; ECG,  
5  
6 electrocardiogram; ED, emergency department; PCI, percutaneous coronary  
7  
8  
9 intervention; MACE, major adverse cardiovascular event.  
10  
11  
12  
13  
14  
15  
16  
17  
18  
19  
20  
21  
22  
23  
24  
25  
26  
27  
28  
29  
30  
31  
32  
33  
34  
35  
36  
37  
38  
39  
40  
41  
42  
43  
44  
45  
46  
47  
48  
49  
50  
51  
52  
53  
54  
55  
56  
57  
58  
59  
60

For peer review only

1  
2  
3  
4 **Figure legends**  
5

6 Figure 1. CSCAP whole-city STEMI care network construction.  
7

8  
9 Figure 2. CSCAP STEMI emergency care flow chart.  
10  
11  
12  
13  
14  
15  
16  
17  
18  
19  
20  
21  
22  
23  
24  
25  
26  
27  
28  
29  
30  
31  
32  
33  
34  
35  
36  
37  
38  
39  
40  
41  
42  
43  
44  
45  
46  
47  
48  
49  
50  
51  
52  
53  
54  
55  
56  
57  
58  
59  
60

For peer review only

1  
2  
3  
4  
5  
6  
7  
8  
9  
10  
11  
12  
13  
14  
15  
16  
17  
18  
19  
20  
21  
22  
23  
24  
25  
26  
27  
28  
29  
30  
31  
32  
33  
34  
35  
36  
37  
38  
39  
40  
41  
42  
43  
44  
45  
46  
47  
48  
49  
50  
51  
52  
53  
54  
55  
56  
57  
58  
59  
60

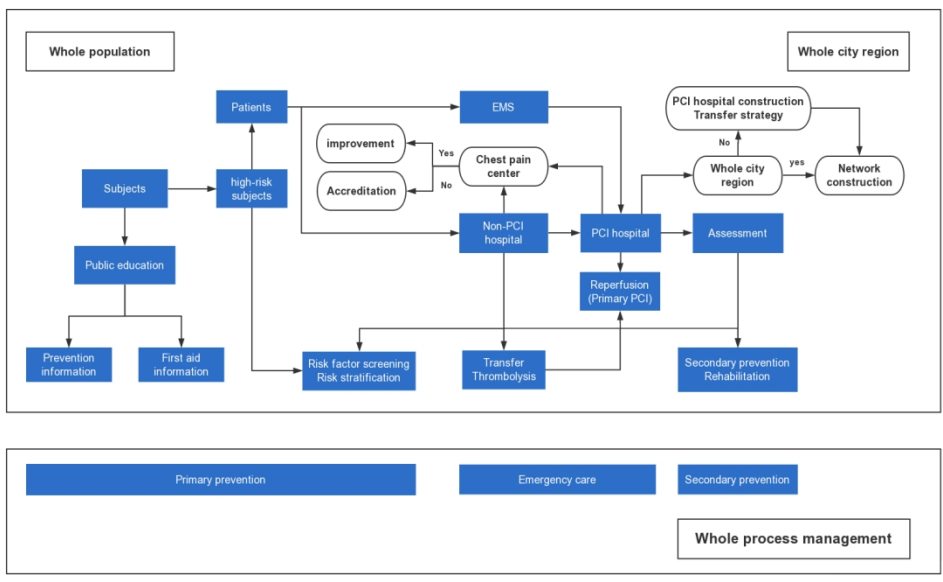

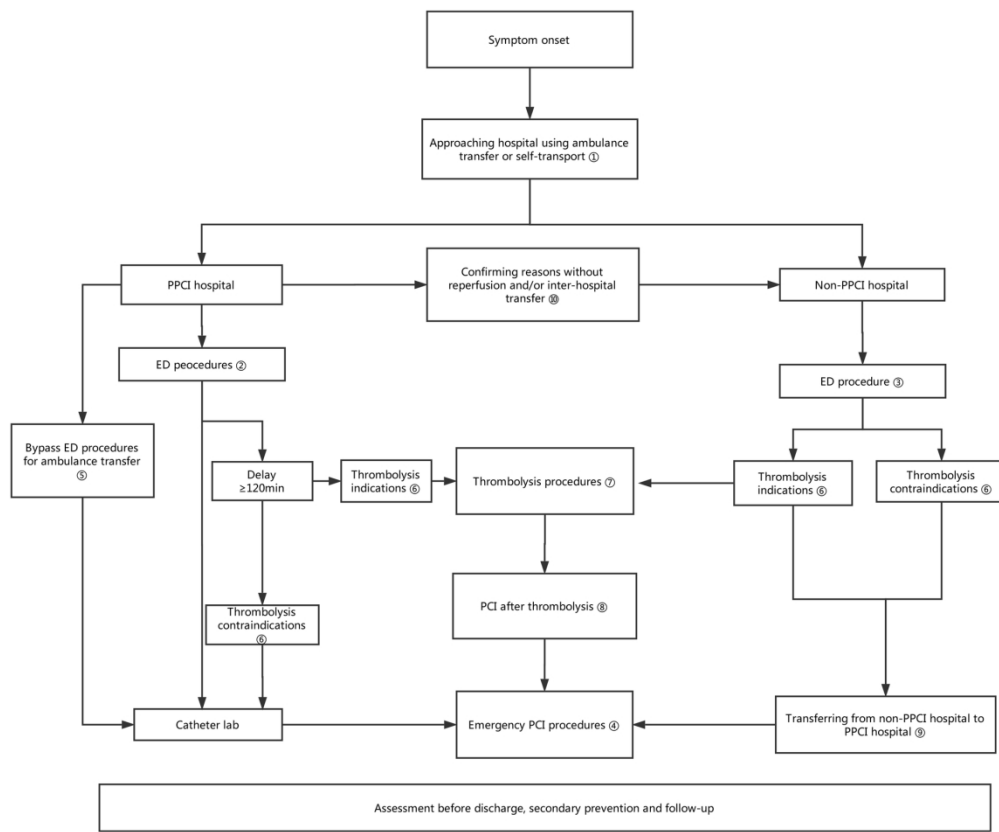

PCI, percutaneous intervention

170x148mm (300 x 300 DPI)
